# Supplementary material for: Data Sharing Reveals Complexity in the Westward Spread of Domestic Animals across Neolithic Turkey
Source: PLoS One. 2014 Jun 13;9(6):e99845. doi: 10.1371/journal.pone.0099845 (PMC4057358; doi:10.1371/journal.pone.0099845)
Supplement: File S2 — LSI values. This file contains Table F-Table I. Table F, LSI values for Ovis. Table G, LSI values for Capra. Table H, LSI values for Bos. Table I, LSI values for Sus. (XLSX) [file pone.0099845.s014.xlsx]

## Sheet: Table F. Sheep measurements
File S2. Table F. LSI data for Ovis aries/orientalis
Author/Reference for pubished data	Arbuckle	Arbuckle and Özkaya 2006	Gourichon and Helmer 2008	Gourichon and Helmer 2008	Helmer 2008:fig.27	Helmer 1988	Atici	Atici	Payne 1985; Buitenhuis and Caneva 1998	Russell et al.	Russell et al.	Russell et al.	Marciniak	Orton and Frame	Arbuckle	Arbuckle	Arbuckle	Carruthers	De Cupere	De Cupere	De Cupere	De Cupere	Çakırlar	Çakırlar	Çakırlar	Galik	Buitenhuis and Caneva 1998	Kansa	Boessneck and von den Driesch 1979		Gourichon and Helmer	Gourichon and Helmer	Buitenhuis	Buitenhuis	Buitenhuis	Buitenhuis	Petes and Pöllath	Uerpmann 2001
site	Hallan Çemi	Körtik	Mureybet Natufian	Mureybet PPNA	Göbekli	Cafer	Karain	Öküzini	Aşıklı	Çatalhöyük EARLY	Çatalhöyük MIDDLE	Çatalhöyük LATE	Çatalhöyük TP	Çatalhöyük West	Köşk II-V	Suberde	Erbaba	Pinarbaşı B	Bademağacı ENI	Bademağacı ENII	Bademağacı LN/EC	Höyücek	Ulucak VI	Ulucak V	Ulucak IV	Çukurici	Yumuktepe	Domuztepe	Fikirtepe	Barcın	Menteşe Middle	Menteşe Late	Ilipinar X	Ilipinar IX	Ilipinar VIII	Ilipinar VI-IV	Pendik	Orman Fidanlığı
	0.10305	0.0214979	0.00824635	0.0359346	-0.00222146	0.0144778	-0.0250843	-0.0112227	0.0654721	-0.00445434	-0.0827411	-0.113279	-0.0762057	0.0805448	-0.0908589	-0.0406995	-0.135709	-0.0835461	-0.0280287	-0.0876783	-0.108581	-0.0963564	0.0180231	-0.0634548	-0.0927541	-0.0779197	-0.0257536	0.0514637	-0.115984	-0.0658173	-0.162488	-0.170209	-0.0747721	-0.0800685	-0.093599	-0.0412288	-0.0701999	0.0372167
	0.094844	0.0454981	0.0192339	0.0377886	0.0194978	0.0144778	-0.0204145	0.0278902	0.0361466	-0.0442828	-0.0774122	-0.107565	-0.0819041	0.0714357	-0.0881361	-0.0376624	-0.122632	-0.0406179	-0.0352921	-0.0480254	-0.0561159	-0.0669468	-0.0590448	0.0321847	-0.0608649	-0.0678031	-0.0433108	0.0694718	-0.110071	-0.114215	-0.156786	-0.153026	-0.0135025	0.0173741	-0.0881361	-0.130888	-0.0681158	0.0215397
	0.0513161	0.0780996	0.0263289	0.0642239	0.0299632	0.0616569	-0.0204145	0.0361235	0.0523572	-0.0204145	-0.0669468	-0.0991315	-0.0603248	0.069197	-0.0854302	-0.0257223	-0.104609	-0.0567276	-0.0442977	-0.10721	-0.0691374	0.13099	-0.0548487	-0.0383964	-0.0494854	-0.0809219	-0.0671629	-0.029805	-0.107546	-0.109824	-0.131124	-0.151158	-0.0516463	-0.00445434	-0.0881361	-0.093599	-0.0599979	0.0190232
	0.0852724	0.00129447	0.0267932	0.0791812	0.0317144	0.0679971	-0.0135025	0.00877392	0.0618764	-0.00822033	-0.0643694	-0.0991315	-0.0662412	0.0658173	-0.0827411	-0.0242526	-0.101093	-0.0213444	-0.0202034	-0.102889	-0.0828018	-0.0876783	0.0215397	0.00663058	-0.0457575	-0.0594784	-0.0778868	-0.0567276	-0.101799	-0.0222764	-0.129348	-0.149298	-0.0105502	-0.0345775	-0.107565	-0.049218	-0.0532455	0.0176632
	0.0393805	0.00258509	0.0285713	0.0921462	0.0401824	-0.0184231	-0.0112227	0.0194978	0.0642239	-0.0634548	-0.0517068	-0.093599	-0.0574959	0.0612697	-0.0747721	-0.0141017	-0.0976043	-0.0557188	-0.0313756	-0.0673994	-0.074941	-0.0867861	-0.0188036	-0.0532455	-0.031158	-0.0598107	-0.0499401	-0.0517068	-0.0943727	-0.0835461	-0.127579	-0.145602	-0.0305841	-0.05926	0	-0.0217192	-0.049218	0.0160868
	0.0433956	0.0626662	0.0377886	0.104735	0.0496878	-0.0112445	-0.0112227	0.0401824	0.0410141	-0.0368026	-0.0467434	-0.0881361	-0.051587	0.0555173	-0.072148	-0.0126708	-0.0890042	-0.0336188	-0.0486919	-0.0745912	-0.0788536	-0.0828018	-0.0111842	-0.0886375	-0.0170333	-0.0117384		-0.0747721	-0.0934217	-0.0876783	-0.126465	-0.137655	-0.0655015	-0.0963564	0.0216111	-0.0107239	-0.0479236	0.0160868
	0.15953	0.0682413	0.0629578		0.0496878	-0.00699362	-0.00895484	0.0237143	0.0521362	-0.0116919	-0.0418361	-0.0881361	-0.05403	0.0543577	-0.0669468	0.0136582	-0.0755886	-0.0679821	-0.0807634	-0.0564814	-0.0928321	-0.0430346	-0.0384583	-0.0383964	-0.0135728	-0.044152		-0.0442828	-0.0881361	-0.115984	-0.122315	-0.129466	-0.0535477	-0.0643694	0.01094	0.00630947	-0.0479236	0.0102493
	0.119364	0.0253059		0.0123115	0.0501666	-0.00418264	-0.00445434	0.0258073	0.00688278	-0.0765169	-0.039403	-0.0881361	-0.0394305	0.05086	-0.0669468	0.0150007	-0.0722985	-0.0157943	-0.038507	-0.0445821	-0.0928321	-0.0577579	-0.0806559	-0.0494854	0.0650336	0.0763204		-0.0180982	-0.0857121	-0.131124	-0.11884	-0.124006	-0.114639	-0.0827411	0.0540969	-0.0713559	-0.0457575	0.0098335
	0.0237143	0.111492		0.0485237	0.0501666	0.00960564	-0.00222146	-0.0135025	0.0401824	-0.154902	-0.0369836	-0.0854302	-0.0936323	0.05086	-0.0669468	0.0216516	-0.0722985	-0.0562229	-0.0667275		-0.065311	-0.06722	0.0180231	-0.0383964	-0.0570385	-0.0118736		0.00421648	-0.0857121	-0.0952681	-0.116907	-0.123644	-0.133122	-0.0774122	0.0750998	-0.0667275	-0.040745	0.00811789
	0.0579919	0.0258073		0.0152847	0.0599264	0.00960564	-0.00222146	0.00877392	0	0.00332794	-0.0345775	-0.0854302	-0.0744691	0.0490601	-0.0643694	0.0242837	-0.0722985	-0.0403746	-0.0682648			-0.0430346	0.00729924	-0.0991315	-0.0647253	-0.0994891		-0.0564814	-0.0819041	-0.0936323	-0.110274	-0.11884	-0.0528133	-0.0250843	0.0788118	-0.013364	-0.0384583	0.00729924
		-0.0140431		0.0203295	0.0656788	0.00960564	0	0.00440912	0.00659701	-0.0886375	-0.0321847	-0.0800685	-0.0729097	0.0485124	-0.0618071	0.0295005	-0.0706627	0.0542953	-0.105214	-0.110274	-0.0729979	-0.0861861	-0.0424982	-0.0747721	-0.0494854	-0.0870974		-0.00212369	-0.0791812	-0.0791812	-0.103541	-0.111492	-0.0134676	-0.0180982	-0.0871502	-0.054621	-0.0384583	0.00659701
		-0.00660537		0.0290714	0.0669468	0.016339	0	0.00221015	0.0521362	-0.101106	-0.0321847	-0.0800685	-0.0682648	0.0485124	-0.05926	-0.0239521	-0.0674095	-0.0298119	-0.0133128	-0.106894	0.053374	-0.103474	-0.0180982	-0.0669468	-0.0886375			-0.0787578	-0.0791812	-0.0791812	-0.101873	-0.111492	-0.0320997	-0.0643694	-0.0271522	-0.0651956	-0.0365168	0.00454763
		0.0339687		0.0333724	0.0669468	0.0229696	0	0.00877392		-0.0205217	0.0340798	-0.0774122	-0.0651956	0.0485124	-0.05421	0	-0.0674095	-0.00276283	-0.0577579	-0.0936323	-0.0686788	-0.0400052	-0.0442828	-0.0643694	-0.0347621			0.0104654	-0.0747721	-0.0682648	-0.09691	-0.108581	-0.0285447	-0.0204145	-0.0442977	-0.0760342	-0.0336831	0.00439425
		0.0504659		0.0346554	0.0694718	0.0229696	0	-0.0227431		-0.0457575	0.0951338	-0.0774122	-0.0636691	0.0425874	-0.0517068	0.0226999	-0.0657921	-0.029118	-0.0235722	-0.0920027	-0.0467434	-0.0457575	-0.0345775	-0.05926	-0.0420613			-0.0813049	-0.0747721	-0.0651956	-0.0906909	-0.103972	-0.0267343	0.0194978	-0.0257536	-0.083945	-0.0321847	0
		0.0513161		0.0440967	0.0694718	0.0327294	0	-0.0227431		-0.0698076	-0.0713801	-0.0774122	-0.0621479	0.0425874	-0.0517068	0.0226999	-0.0657921	-0.0581324	-0.0634104	-0.0903791	-0.0695396	-0.0675262	-0.039403	-0.05926	-0.0494854			0	-0.0713559	-0.0651956	-0.0897314	-0.101275	-0.0473169	-0.0881361	0.00131405	-0.0531311	-0.022664	0
		0.057251		0.0485237	0.0694718	0.0359346	0	0.00221015		-0.0257536	-0.0525969	-0.0774122	-0.0621479	0.0413927	-0.049218	0.066644	-0.0641806	-0.0161951	-0.0596339	-0.0887617		-0.0745292	-0.0369836	-0.05421	-0.0608649			-0.0985582	-0.0701999	-0.060632	-0.0882412	-0.101106	0.0167802	-0.0942699	-0.0413927	-0.0936323	-0.022664	0
		0.0603777		0.05882	0.0694718	0.0460349	0.00221015	0.0462004		-0.0370713	-0.0642409	-0.0774122	-0.0428428	0.0389933	-0.0467434	0.0809431	-0.0641806	-0.0476174	-0.0710634	-0.0871502		-0.0825349	-0.0274382	-0.0517068	-0.13692			-0.0903791	-0.0658173	-0.0457575	-0.0881361	-0.101106	-0.0501666	-0.0737078	-0.0807634	-0.0655015	-0.0215397	-0.00494458
		0.0675104		0.0627908	0.0694718	0.0460349	0.00221015	0.0462004		-0.0215843	-0.0435014	-0.0774122	-0.038507	0.0377886	-0.0442828	0.0101849	-0.0593817	0.0128372	-0.0383964	-0.083945		0.0180445	-0.0567276	-0.049218	-0.0854302			-0.0871502	-0.0636691	-0.0466689	-0.0855446	-0.0990869	-0.0340798	-0.0352921	-0.0667275	-0.0634863	-0.0135025	-0.00494458
		0.0736838		0.0636188	0.0788118	0.0485237	0.00440912	0.0130953		-0.0412288	-0.0642409	-0.0747721	-0.038507	0.0377886	-0.0418361	0.0447257	-0.0577938	-0.0595218	0.0049824	-0.0823513		-0.0483047	-0.0345775	-0.0250843	-0.0854302			-0.0855446	-0.0636691	-0.0788536	-0.0850108	-0.0985335	-0.0340798	-0.0261966	0.0377886	-0.0861861	-0.00843317	-0.00653087
		0.0764412		0.0681158	0.0788118	0.0485237	0.00440912	-0.00895484		-0.0253059	-0.0466178	-0.0747721	-0.0342141	0.0360353	-0.029805	-0.018711	-0.0562116	-0.0551379	-0.0785136	-0.0807634			-0.0517068	-0.0227431	-0.0747721			-0.083945	-0.0636691	-0.015923	-0.0805196	-0.0952681	-0.0133128	-0.0239521	-0.0327925	-0.0736576	0	-0.00742402
		0.0804063		0.0902973	0.0835461	0.0485237	0.00659701	0.00440912		-0.0420613	-0.0309115	-0.0747721	-0.0229696	0.0360353	-0.029805	-0.00526424	-0.0546353	-0.0502848	-0.0845596	-0.0807634			-0.0800685	-0.0227431	-0.072148			-0.083945	-0.0636691	-0.0725507	-0.0800685	-0.0940622	-0.0235722	-0.0239521	0.0104028	-0.142668	0.00877392	-0.00742402
		0.0819041		0.123549	0.0843209	0.0485237	0.00877392	0.0599264		0.00811789	-0.014609	-0.0747721	0.012965	0.0353691	-0.0274382	0.198193	-0.0514995	-0.0864216	-0.0238496	-0.0791812			-0.0418361	-0.0135025	-0.0643694			-0.0823513	-0.0627908	-0.0570385	-0.0800685	-0.0920755	-0.00660537	-0.0217192	-0.0535477	-0.090444		-0.00827253
		0.082459			0.0862519	0.0522304	0.00877392	0		-0.05589	0.0430972	-0.0747721	0.00549052	0.0348618	-0.0204145	0.0303119	-0.0483863	-0.0153583	-0.03809	-0.0791812			-0.0369836	-0.00445434	-0.05926			-0.0823513	-0.0627908	-0.064147	-0.0798767	-0.0908074	-0.0577579	-0.0107239	-0.0438316	-0.135489		-0.00827253
		0.0852724		0.011281	0.0879552	0.054684	0.01524	-0.00222146		-0.00494458	-0.0762468	-0.0747721	-0.0616382	0.034636	-0.0135025	0.0563537	-0.046838	-0.0632818	-0.0490854	-0.0760342			-0.0180982	0.00440912	-0.05421			-0.0744691	-0.0626468	-0.143028	-0.0778868	-0.0899612	-0.0116262	0	-0.0123337	-0.0777937		-0.00827253
		0.0888173			0.0879552	0.0784869	0.0173741	-0.0215627		0.0239122	-0.0762468	-0.0747721	-0.103031	0.0341543	-0.00669876	-0.021451	-0.046838	-0.00221391	-0.0261908	-0.0729097			-0.0345775	0.0216111	-0.05421			-0.0744691	-0.0626468	-0.120211	-0.0773565	-0.0871502	0.00163576	0	-0.0381045	-0.101275		-0.00893182
		0.0892426			0.0942699		0.0194978	0.0159881		-0.0270465	-0.071882	-0.072148	-0.0798448	0.0339964	0.00877392	0.00777862	-0.0452952	-0.105271	-0.00668159	-0.0682648			-0.0467434	-0.0721807	-0.0467434			-0.0713559	-0.0626468	-0.0436022	-0.0765169	-0.0861861	-0.00827253	0.00839243	-0.051587	-0.0861861		-0.00893182
		0.0928825			0.104735		0.0194978	-0.00752933		-0.0430346	-0.0590448	-0.072148	-0.0667626	0.0329361	0.0194978	0.0540498	-0.0437579	-0.0552665	-0.100427	-0.0682648			-0.0375419	-0.083945	-0.039403			-0.0698076	-0.0626468	-0.0778868	-0.0763883	-0.0847894	-0.00494458	0.00839243	-0.0757207	-0.0794406		-0.00895484
		0.10305			0.104735		0.0216111	0.0364293		-0.0368527	-0.0506927	-0.072148	-0.0417243	0.0317144	0.048188	0.189507	-0.042226	-0.0506927	-0.0171454	-0.0667275			-0.0271522	-0.0591215	-0.0345775			-0.0651956	-0.0618071	-0.0701999	-0.0757207	-0.0840728	-0.0586455	0.0125286	-0.0141246	-0.0701999		-0.0103
		0.117084			0.114955		0.0237143	-0.0258627			-0.0344555	-0.0695396	-0.0417243	0.0309199	0.0915593	-0.00773245	-0.0406995	-0.0833231	-0.0274382	-0.0651956			-0.0807634	-0.0682648	-0.029805			-0.060632	-0.0618071	-0.103972	-0.0747721	-0.0823513	0.0330003	0.0267026	-0.047692	-0.0686788		-0.0112227
		0.14402					0.0258073	-0.0180116			-0.0304893	-0.0695396	-0.0392981	0.0280287	-0.087805	0.0175243	-0.0361518	0.0134086	-0.039403	-0.0636691			-0.103541	-0.0791812	-0.0204145			-0.060632	-0.0618071	-0.079742	-0.0747721	-0.0808232		0.049974	-0.051587	-0.0611518		-0.0115819
		0.0537341					0.0278902	-0.0116919			0.0387077	-0.0695396	-0.0309115	0.0278215	-0.0842157	-0.00256222	-0.0346465	-0.0846628	-0.0274382	-0.0636691			-0.0621479	-0.060632	-0.0157943			-0.060632	-0.061518	-0.079742	-0.0747212	-0.0803409		0.049974	-0.09691	-0.0566975		-0.0118272
		0.0556021					0.0299632	0.002031			0.0387077	-0.0669468	-0.0273662	0.0267932	-0.0753703	0.0272297	-0.027197	-0.0987542	-0.0135025	-0.0621479			-0.0327925	-0.0667275	-0.0157943			-0.0591215	-0.0599979	-0.0435696	-0.0747212	-0.0794406		0.103219	-0.0362122	-0.0508285		-0.0123292
		0.0192339					0.0299632	0.00472431			-0.100213	-0.0669468	-0.014609	0.0267932	-0.0649883	0.0595857	-0.0242526	-0.276002	-0.0517068	-0.060632			0.00326539	-0.0651956	-0.0258627			-0.0561159	-0.0579919	-0.0264523	-0.0734289	-0.0762254		-0.11884	-0.112383	-0.0479236		-0.014609
		0.033733					0.0299632	0.00939777			-0.0667275	-0.0669468	-0.0344859	0.0267837	-0.0598889	-0.0205217	-0.0242526	-0.250368	-0.0376396	-0.060632			0.0160868	0.037652	0.013364			-0.0561159	-0.0561159	-0.0591215	-0.0732584	-0.0757207		-0.083945	-0.0405095	-0.0379064		-0.014609
		0					0.0320264	0.00523253			-0.0636691	-0.0669468	-0.00780525	0.0264052	-0.0582023	-0.0259788	-0.0242526	-0.052345	-0.06722	-0.0561159			-0.0577579	-0.0867861	-0.0603248			-0.0561159	-0.0561159	-0.0392266	-0.0729097	-0.0747957		-0.083945	0.00549052	-0.0364941		-0.014609
		0.012429					0.0320264	-0.0147233			-0.054621	-0.0669468	-0.202351	0.0257435	-0.0565223	-0.0244941	-0.0198731	0.0272878		-0.054621			-0.00827253	-0.0729979	-0.0713559			-0.054621	-0.0561159	0.09691	-0.0695396	-0.0747721		-0.0807634	-0.0565735	-0.0171889		-0.0149772
		-0.0202034					0.0340798	-0.0160868			-0.0413927	-0.0669468	-0.178313	0.0257435	-0.0548487	-0.00390672	-0.0169778	-0.0305489		-0.054621			0	-0.0535477	-0.0442977			-0.0531311	-0.0561159	-0.075251	-0.0692386	-0.0732545		-0.0729097	-0.0745646	-0.0714059		-0.0149772
		0.0567611					0.0340798	0.0193052			-0.0413927	-0.0669468	-0.174985	0.0257435	-0.0498663	-0.00281098	-0.0155374	-0.0534443		-0.054621			0.0230653	-0.105684	0.0255541			-0.0501666	-0.0561159	-0.0659609	-0.0669468	-0.0729097		-0.0713559	-0.0379064	-0.0882412		-0.0150059
		0.0109607					0.0340798	-0.00796893			-0.0413927	-0.0669468	-0.155536	0.0257435	-0.0482181	0.00832539	-0.0155374	-0.0115819		-0.0516463			-0.0356404	-0.0695604	-0.0903791			-0.0442977	-0.0561159	-0.0323108	-0.0664801	-0.0729097		-0.0682648	-0.0479236	-0.0488819		-0.0157533
		0.0346554					0.0361235	-0.0026401			-0.0413927	-0.0669468	-0.152377	0.0255541	-0.0482181	0.0231861	-0.0155374			-0.0516463			-0.0174547	-0.094744	-0.106894			-0.0442977	-0.0561159	-0.0484975	-0.0626468	-0.072148		-0.0682648	-0.0686788	-0.0576161		-0.0163025
		0.0583387					0.0381577	0.0329361			-0.0399474	-0.0669468	-0.146128	0.0255541	-0.0433108	0.040803	-0.0126708			-0.0356404			-0.0147233	-0.0222764	-0.0651956			-0.0413927	-0.0552228	-0.035856	-0.0626468	-0.072148		-0.0621479	-0.0730604	-0.0651956		-0.0167057
		0.0819475					0.0381577	-0.0299632			-0.0356404	-0.0669468	-0.13692	0.0247008	-0.0352531	0.0758786	-0.0112445			-0.0356404			-0.0394305	-0.0513614	-0.0729097			-0.038507	-0.0552228	-0.0430346	-0.0621479	-0.0706461		-0.0591215	-0.0442037	0.00653087		-0.0167057
		-0.00558586					0.0401824	-0.0342141			-0.0313756	-0.0643694	-0.133894	0.0247008	-0.0336594		-0.00982291			-0.0271522			-0.0430346	-0.0537531	-0.0160868			-0.0327925	-0.0552228	-0.117386	-0.0618071	-0.0693477		-0.0591215	-0.0274687	-0.00396619		-0.0167057
		0.0359346					0.0401824	-0.00663058			-0.0271522	-0.0643694	-0.133894	0.0247008	-0.0165037		-0.00699362			-0.0271522			0.0192339	-0.115112	-0.0855446			-0.0299632	-0.0486919	-0.0332409	-0.061518	-0.0692386		-0.0576161	-0.0174547	0.00131405		-0.0167057
		0.0410141					0.0401824	-0.0188269			-0.0257536	-0.0643694	-0.121994	0.0243115	-0.0165037		-0.00699362			-0.00931142			-0.0235722	-0.0671629	-0.0791812			-0.0243593	-0.0479236	-0.0828539	-0.0613339	-0.0692386		-0.0561159	0.00782534	-0.133211		-0.0177288
							0.0442037	-0.0147233			-0.0243593	-0.0643694	-0.0747721	0.0239122	0.0014697		-0.00699362			-0.0989634			-0.0235722	-0.0566975	-0.103541			-0.0188269	-0.0479236	-0.0115819	-0.0612697	-0.0688813		-0.0561159	0	-0.0577579		-0.0194286
							0.0442037	0.0180445			-0.0229696	-0.0643694	-0.072148	0.0230653	0.0116206		-0.00558586			-0.0788536			0.0207989	-0.0450379	-0.0788536			-0.0188269	-0.0439055		-0.0599979	-0.0667626		-0.0561159	0.00393029	-0.05403		-0.0203613
							0.0442037	0.00653087			-0.0215843	-0.0643694	-0.0695396	0.0226078	0.0158994		-0.00558586			-0.0768929			-0.0430346	-0.0322844	-0.074941			-0.0188269	-0.0430346		-0.0589475	-0.0666252		-0.054621	-0.0729097	-0.0466689		-0.0203613
							0.0462004	0.0255541			-0.0215843	-0.0643694	-0.0695396	0.0218155	0.0187287		-0.00418264			-0.0710634			-0.0430346	-0.091688	-0.094744			-0.0174547	-0.0369836		-0.0576161	-0.0656523		-0.054621	-0.0486919	-0.0376396		-0.0204145
							0.0462004	0.0142404			-0.0215843	-0.0643694	-0.0669468	0.0218155	0.0257223		-0.00418264			-0.0634104			-0.0201254	-0.11115	-0.0614803			-0.00796893	-0.0369836		-0.05589	-0.0643808		-0.0531311	-0.0106581	-0.035856		-0.0204145
							0.048188	0.0353691			-0.0215843	-0.0643694	-0.0643694	0.0207989	0.0393805		-0.00418264			-0.061518			0.0406471	-0.0215843	-0.047692			0	-0.0369836		-0.0552228	-0.0643694		-0.0501666	0.00262414	-0.0305489		-0.0208501
							0.048188	-0.0106581			-0.0174547	-0.0643694	-0.0618071	0.0207989	-0.0928321		-0.00278395			-0.0596339				-0.0376396	-0.0655015			0.00393029	-0.0369836		-0.0552228	-0.0641929		-0.0501666	-0.0484975	-0.0287942		-0.0213631
							0.048188	-0.0271522			-0.0120089	-0.0618071	-0.05926	0.0205047	-0.06722		-0.00138974			-0.0577579				-0.0305489	-0.0716041			-0.0948663	-0.0280287		-0.0535477	-0.0596339		-0.0486919	-0.0218453	-0.0253059		-0.0234811
							0.0501666	0			-0.0106581	-0.0618071	-0.05926	0.0202623	-0.061518		-0.00138974			-0.05403				-0.00164195	-0.051587			-0.0828018	-0.0280287		-0.0531311	-0.05926		-0.0486919	-0.0586455	-0.0218453		-0.0238496
							0.0521362	0.0193052			-0.0106581	-0.0618071	-0.0567276	0.0193052	-0.0596339		-0.00138974			-0.052178				-0.0394305	-0.0798767			-0.0710634	-0.0271522		-0.0516825	-0.0574959		-0.0472222	0.0434657	-0.0218453		-0.0238496
							0.0521362	0.0218155			-0.00663058	-0.0618071	-0.0567276	0.0193052	-0.0596339		-0.00138974			-0.0503339				-0.00329013	-0.105343			-0.0691374	-0.0267343		-0.0516825	-0.0534443		-0.0457575		-0.0167057		-0.0250186
							0.0540969	0.012965			-0.0026401	-0.0618071	-0.05421	0.0192339	-0.0412288		-0.00138974			-0.0412288				-0.0596339	-0.0825349			-0.061518	-0.0250843		-0.0516463	-0.0531311		-0.0413927		-0.0150059		-0.0250843
							0.0560488	-0.0174547			0.00262414	-0.0618071	-0.05421	0.0183913	-0.0323108		0.00138531			-0.0394305					-0.0686204			-0.05403	-0.0244246		-0.0503245	-0.0504526		-0.0413927		-0.0133128		-0.0253059
							0.0579919	-0.0299632			0.00262414	-0.0618071	-0.0517068	0.0183913	-0.255929		0.00138531			0.00326539					-0.0513614			-0.0412288	-0.0202034		-0.0501666	-0.049218		-0.0399474		-0.00827253		-0.0261908
							0.0618524	-0.0472222			0.00911596	-0.05926	-0.0517068	0.0183913	-0.0297764		0.00276622								-0.0347621			-0.035856	-0.0202034		-0.0501666	-0.0484975		-0.0399474		-0.00164195		-0.0268721
							0.0637698	-0.0285555			0.0292608	-0.05926	-0.049218	0.0180445	-0.0105931		0.00414275			-0.09691					-0.0873647			-0.0340798	-0.0202034		-0.0472222	-0.0478499		-0.0399474		0		-0.0268721
							0.0675794	-0.0442977			0.0223583	-0.05926	-0.049218	0.0180445	-0.00792048		0.00414275			-0.0865937					-0.0873647			-0.0150059	-0.0135025		-0.0466178	-0.047692		-0.038507		-0.066566		-0.0268721
							0.0276044	0.0180445			-0.0412288	-0.05926	-0.049218	0.0173308	0.00260838		0.00414275			-0.0845596					-0.0803409			-0.00994611	-0.0135025		-0.044848	-0.047692		-0.0370713		0.00454763		-0.0283336
							0.0450784	-0.0174547			-0.0596339	-0.05926	-0.049218	0.0167802	0.114346		0.00551492			-0.0825349					-0.0711492			-0.00827253	-0.013364		-0.0430346	-0.0472222		-0.0356404		-0.0115819		-0.0297265
							-0.0109954	-0.0243593			-0.0788536	-0.05926	-0.0467434	0.0167802	0.14162		0.00688278			-0.0825349					-0.0621479			-0.00827253	-0.013364		-0.0412288	-0.046936		-0.0327925		-0.0332409		-0.0299632
							0.0320392	0.0116858			-0.0287942	-0.05926	-0.0467434	0.0164942	0.191512		0.00688278			-0.0785136					-0.11845			0.00326539	-0.013364		-0.0399474	-0.0457575		-0.0313756		-0.0561159		-0.0304893
							0.0276044	-0.0531311			-0.0805196	-0.05926	-0.0467434	0.0163904	-0.275094		0.00688278			-0.0725507					-0.086528			0.00650641	-0.013364		-0.0399474	-0.0442828		-0.0299632		-0.0920027		-0.0305841
							0.0295106	-0.0253059			-0.0725507	-0.05926	-0.0442828	0.0160868	-0.262685		0.00960564			-0.0647253					-0.0611518			0.00811789	-0.00663058		-0.0394305	-0.0422409		-0.0299632		-0.0713559		-0.031663
							0.00806762	0.00650641			-0.0589475	-0.05926	-0.0442828	0.0160868	-0.253605		0.00960564			-0.0608649					-0.0522884			0.0160868	-0.00663058		-0.035684	-0.0399474		-0.0299632				-0.0320997
							-0.0144893	0.0391521			-0.0513614	-0.0567276	-0.0418361	0.0151433	-0.219074		0.00960564			-0.0570385					-0.0747957			-0.0883098	0		-0.0352921	-0.0394305		-0.0299632				-0.0340798
							0.0326691	0.00650641			-0.0476174	-0.0567276	-0.0418361	0.0142404	-0.213576		0.0123115			-0.0551379					-0.0952925			-0.0840728	0		-0.0327925	-0.038507		-0.0299632				-0.035684
							0.00539503	0.031599			-0.0420613	-0.0567276	-0.039403	0.0141335	-0.171935		0.0123115			-0.0551379					-0.082565			-0.051587	0		-0.0313756	-0.0369836		-0.0271522				-0.0362122
							0.0282407	0.0270032			-0.0803409	-0.0567276	-0.039403	0.0141335	-0.0293671		0.0136582			-0.0532455					-0.0717265			-0.0438316	0		-0.0305489	-0.0362122		-0.0271522				-0.0362122
							-0.000679116	-0.00164195			-0.0757207	-0.0567276	-0.039403	0.0141335	-0.0874341		0.016339			-0.0476174					-0.0671629			-0.0400052	0.00643411		-0.0299632	-0.0342141		-0.0215843				-0.0376396
							0.014678	-0.0167057			-0.0711492	-0.0567276	-0.0345775	0.0130625	-0.023623		0.016339			-0.0457575					-0.0747957			-0.0105502	0.00653087		-0.0283336	-0.0340798		-0.0215843				-0.03809
							0.0172943	0.034636			-0.0511525	-0.0567276	-0.0345775	0.0130625	0.0749024		0.0176733			-0.0365754					-0.082565			-0.09691	0.00653087		-0.0274382	-0.0287942		-0.0174547				-0.0384583
							0.0295106	0.0160868			-0.0177288	-0.0567276	-0.0321847	0.012965	0.0896974		0.0242837			0.0115379					-0.0701999			-0.0780247	0.00877392		-0.0273662	-0.0283336		-0.0160868				-0.0384583
							0.0244087	0.0451015			-0.0611518	-0.0567276	-0.0274382	0.0129168	0.108008		0.0242837			-0.0589475					-0.0667275			-0.0711492	0.00877392		-0.0271522	-0.0271522		-0.0147233				-0.0404287
							0.0523572	-0.00827253			-0.0508285	-0.05421	-0.0227431	0.0127743	0.119799		0.0242837								-0.0356404			-0.0621479	0.013364		-0.0215843	-0.0250186		-0.013364				-0.0404287
							0.0237667	0.034636			-0.0393234	-0.05421	-0.0204145	0.0120459	0.00254719		0.0255937			-0.0845596					-0.0243593			-0.0489865	0.0255541		-0.0215843	-0.0203613		-0.0120089				-0.040745
							0.0127054	-0.0235722			-0.0364941	-0.05421	-0.0204145	0.0119888	-0.0654759		0.0255937			-0.0765169					-0.054621			-0.0152996	0.0255541		-0.0215843	-0.0174547		-0.00931142				-0.041257
							0.00405254	-0.0133128			-0.0350863	-0.05421	-0.0180982	0.0115136	-0.0515671		0.0282021			-0.0686204					-0.0160868			-0.0686204	0.0555173		-0.00663058	-0.0129008		-0.00663058				-0.0413927
							0.0250497	0.0239122			-0.0171889	-0.0517068	-0.0157943	0.011323	-0.0478499		0.0282021			-0.0647253					-0.0936323			-0.0551379			-0.0026401	-0.00924066		-0.00396619				-0.0418361
							0.0345533	-0.0201254			-0.0104971	-0.0517068	-0.0135025	0.0104028	-0.0332912		0.0295005			-0.0647253					-0.0634104			-0.0589475			0.0230653			-0.0026401				-0.042752
							0.039538	0.0391521			-0.00784891	-0.0517068	-0.0135025	0.0104028	-0.0226837		0.0307949			-0.0608649					-0.05403			-0.100238						0.00131405				-0.0442037
							0.0426247	0.0145047			0.0177806	-0.0517068	-0.0112227	0.0104028	-0.0882412		0.0320856			-0.0570385					-0.0484975			-0.0892426						0.012965				-0.0446865
							-0.0109954	0.0436217			0.040803	-0.0517068	-0.0112227	0.0103	-0.079742		0.0333724			-0.0532455					0.00650641			-0.0865367						0.0193052				-0.0449404
							0.0179459	0.0791812			-0.0536111	-0.0517068	-0.00895484	0.0103	-0.0632269		0.0333724			-0.0494854					-0.065311			-0.0798448						0.0401946				-0.0467434
							0.0224799	0.0160868			-0.0697578	-0.0517068	-0.00669876	0.0098335	-0.0536111		0.0333724			-0.0494854					-0.0305489			-0.0616382						-0.09691				-0.049218
							0.0180445	0.0129168			-0.0504526	-0.049218	-0.00445434	0.0098335	-0.0426554		0.0346554			-0.00335364					-0.0184122			-0.0528133						-0.0798767				-0.049218
							0.0155122	0.0581968			0.00911596	-0.049218	-0.00445434	0.00972342	-0.0380434		0.0359346			-0.0805196					-0.044848			-0.0466178						-0.0695604				-0.0496351
							0.052029	0.0160868			0.0116858	-0.049218	0.00877392	0.00911596	-0.00281098		0.03721			-0.103972					-0.06722			-0.0332912						-0.0655015				-0.0498663
							-0.00931142	0.00650641			0.0142404	-0.049218	0.0130953	0.00911596	0.0502176		0.0410141			-0.0951623					-0.0167057			-0.00780525						-0.0614803				-0.0511525
							0.0401946	0.0239122			-0.0305489	-0.049218	0.0173741	0.00911596	-0.107546		0.0472811			-0.0951623					-0.0808232			0.0758533						-0.0594835				-0.0511525
							0.0341543	0.0361466			0.0859566	-0.049218	-0.0763385	0.00860017	-0.0951623		0.0485237			-0.0697578								-0.101799						-0.0594835				-0.052029
							0.012965	0.0391521			-0.0133128	-0.049218	-0.0763385	0.00782534	-0.0899612		-0.0736227			-0.0664801								-0.093681						-0.0555173				-0.052178
							0.0218155	0.0129168			-0.0133128	-0.049218	-0.0656523	0.00766744	-0.086528		-0.0736227			-0.052029								-0.093681						-0.0535477				-0.0528133
							0.0646848	-0.00827253			0.0239122	-0.049218	-0.059662	0.00766744	-0.0831217		-0.0632818			-0.0504526								-0.081						-0.0535477				-0.0532455
							0.0304893	-0.0116262			0.0192339	-0.0467434	-0.0522884	0.00653087	-0.0831217		-0.0465761			-0.0365168								-0.0778868						-0.051587				-0.05421
							0.0218155	-0.00827253			-0.0340798	-0.0467434	-0.0450379	0.00653087	-0.0488819		-0.0449404			-0.0334798								-0.0747957						-0.0438316				-0.0565735
							-0.0188269	0.0192339			0.118333	-0.0467434	-0.040745	0.00650641	-0.0744691		-0.0449404			-0.0908589								-0.0732584						-0.0438316				-0.0565735
							0.0555173	0.037652			-0.06722	-0.0467434	-0.0393234	0.00549052	-0.0399474		-0.0433108			-0.0881361								-0.0701999						-0.0381045				-0.0565735
							0.0461521	-0.0150059			-0.00660537	-0.0467434	-0.0379064	0.00523253	-0.0327925		-0.0304893			-0.0774122								-0.0701999						-0.032452				-0.0578341
							-0.0026401	-0.00660537			0.00811789	-0.0467434	-0.0350863	0.00523253	-0.00663058		-0.0289129			-0.0774122								-0.0671629						-0.0305841				-0.0613893
							0.0243115	0.00326539			-0.0412288	-0.0467434	-0.0336831	0.00488892	0.0142404		-0.0289129			-0.0774122								-0.064147						-0.0305841				-0.061518
							-0.013364	-0.00827253			0.011323	-0.0467434	-0.0295005	0.00439796	0.0193052		-0.0242178			-0.05926								-0.0611518						-0.0287242				-0.0626468
							0.0218155	-0.0305489			-0.0908589	-0.0467434	-0.0253577	0.00393029	0.0280287		-0.0195729			-0.05926								-0.0611518						-0.0268721				-0.0629136
							0	0.00166716			-0.0854302	-0.0467434	-0.0212541	0.00393029	0.0304893		-0.0165037			-0.05926								-0.0611518						-0.025028				-0.0658173
							0.00653087	-0.00843317			-0.0618071	-0.0467434	-0.0212541	0.00346053			-0.0104295			-0.0567276								-0.0566975						-0.025028				-0.0669468
							-0.00663058	-0.00167358			-0.05926	-0.0467434	-0.0131614	0.00330264			-0.00742402			-0.0517068								-0.0537531						-0.025028				-0.0669468
							0.0155122	-0.0135728			-0.05926	-0.0467434	0.00643411	0.00330264			-0.00592903			-0.0517068								-0.0508285						-0.0231917				-0.0675262
							-0.0229696	0			-0.0567276	-0.0442828	0.0140313	0.00330264			-0.00592903			-0.0442828								-0.0493736						-0.0177288				-0.0701999
							0.0116858	0			-0.0467434	-0.0442828	-0.054621	0.00262414			-0.00443916			-0.039403								-0.0479236						-0.015923				-0.0725507
							-0.0370713	-0.00843317			-0.0418361	-0.0442828	-0.0428428	0.00220455			-0.00443916			-0.0369836								-0.0450379						-0.015923				-0.0732545
							0.012965	0.0147789			-0.039403	-0.0442828	-0.0188269	0.00163576			-0.0029544			-0.0112227								-0.0436022						0				-0.0737862
							0.0142404	0.0518943			-0.039403	-0.0442828	-0.0026401	0.00163576			-0.0029544			-0.061518								-0.0379064						0				-0.0747212
							0.0436217	0.0368131			-0.0345775	-0.0442828	0.00393029	0.00163576			-0.00147469											-0.0336831						0.00173371				-0.074941
							0.0300725	0.0290714			-0.0321847	-0.0442828	0.0142404	0.00131405			-0.00147469											-0.0336831						0.0220157				-0.075251
							0.0451015	0.0243593			-0.029805	-0.0442828	0.0230653	0.00110367			0											-0.0295005						-0.149967				-0.0778262
							0.0361466	0.0211893			-0.0112227	-0.0442828	0.0255541	0.00110367			0.00293443											-0.0212541						-0.142668				-0.0778868
							0.0495106	0.0368131			0.048188	-0.0442828	-0.052178	0			0.00439425											-0.0185398						-0.135489				-0.0785136
							0.00650641	-0.0118528			-0.0794528	-0.0442828	-0.044848	0			0.00439425											-0.0131614						-0.128427				-0.0808232
							0.0361466	0.0147789			-0.0424982	-0.0418361	-0.035856	0			0.00729924											-0.0118272						-0.114639				-0.0892426
							0	0.0195956			-0.0762468	-0.0418361	-0.0340798	0			0.00729924											-0.00260057						-0.107905				-0.0908589
							0.0524253	-0.0205217			0.0387077	-0.0418361	-0.0305489	-0.00110648			0.0101849											-0.00129834						-0.105684				-0.0947055
							0.0524253	-0.00673338			0.0109034	-0.0418361	-0.0287942	-0.00110648			0.0144778											0						-0.101275
							-0.00329013	0.033733			-0.0472222	-0.039403	-0.0235722	-0.00110648			0.0173164											0.0089813						-0.0990869
							0.0538754	-0.00504022			-0.0920027	-0.039403	-0.0218453	-0.00140321			0.0187287											0.0251835						-0.09691
							0.0270032	0.0352758			-0.054621	-0.039403	-0.0167057	-0.00164195			0.0201365											-0.133427						-0.090444
							-0.00827253	0			0.0722985	-0.039403	-0.00994611	-0.00167358			0.0243326											-0.0442037						-0.0883098
							-0.0116262	0.0664693			-0.052178	-0.039403	-0.00994611	-0.00221579			0.0257223											-0.0289637						-0.0883098
							0.037652	0.00990829			-0.0643808	-0.039403	-0.00660537	-0.00221579			0.0271076											-0.0230144						-0.0883098
							-0.00164195	0.0195956			-0.0577163	-0.039403	-0.00329013	-0.00260057			0.0284885											0.00694886						-0.0883098
							0.031599	-0.00843317			-0.227453	-0.039403	-0.00164195	-0.0026401			0.0284885											0.00694886						-0.0861861
							0.0239122	0.00166716			-0.0632269	-0.0369836	0	-0.0026401			0.0284885											-0.0776049						-0.0819697
							-0.0116262	0.00990829			-0.0253577	-0.0369836	0.00163576	-0.0026401			0.0284885											-0.0636691						-0.0819697
							-0.00827253	0.0474246			-0.0267343	-0.0369836	0.00488892	-0.00329013			0.0298651											-0.060632						-0.0798767
							0.00163576	0.00827253			0.00523253	-0.0369836	0.00811789	-0.00329013			0.0312372											-0.0591215						-0.0736576
							0.034636	0.00827253			0.0292608	-0.0369836	0.0145047	-0.00332794			0.0312372											-0.0561159						-0.0716041
							0.0270032	-0.00843317			-0.0466689	-0.0369836		-0.00332794			0.0312372											-0.0472222						-0.0675262
							0.042137	0.053374			-0.0430346	-0.0369836		-0.00332794			0.0326051											-0.0457575						-0.0655015
							0.0361466	0.0163904			-0.0270465	-0.0369836		-0.00348833			0.0326051											-0.0442977						-0.0594835
							0.0361466	0			-0.0184122	-0.0369836		-0.00348833			0.035328											-0.038507						-0.0574959
							0.0436217	0.0259357			-0.0167057	-0.0369836		-0.00396619			0.035328											-0.0342141						-0.051587
							-0.0133128	0.0444191			-0.0150059	-0.0345775		-0.00396619			0.036683											-0.0215843						-0.0438316
							0.037652	0.00166716			-0.0133128	-0.0345775		-0.00444295			0.0380339											-0.00931142						-0.0381045
							0.034636	0.0290714			-0.00827253	-0.0345775		-0.00444295			0.040723											-0.00529634						-0.0305841
							0.0145047	-0.00673338			-0.00494458	-0.0345775		-0.00529634			0.0420613											-0.00529634						-0.0933333
							0.00163576	0.033733			0.042137	-0.0345775		-0.00529634			0.0420613											0.00262414						-0.0453893
							0.0223583	0.00166716			0.0709087	-0.0345775		-0.00556082			0.0433956											0.00653087						0.00110367
							0.00163576	0.00663058				-0.0345775		-0.00564027			0.0460518											0.00782534						-0.0719483
							0.0160868	0.033733				-0.0321847		-0.00653087			0.0473739											0.0167802						-0.0417243
							0.0129168	0.0413927				-0.0321847		-0.00660537			0.0473739											-0.0184122						-0.0590984
							0.034636	0.0577831				-0.0321847		-0.00660537			0.0486919											-0.0133128						-0.0490854
							0.0306309	0.0321847				-0.0321847		-0.00663058			0.0526222											0.0176632						-0.014609
							0.0259357	0.00166716				-0.0321847		-0.00663058			0.0578079											0.00488892						0.0490601
							0.0563184	0.0243593				-0.0321847		-0.00663058			0.0590947											0.0223583						0.0267837
							-0.00167358	-0.0170333				-0.0321847		-0.00668159			0.0603777											-0.00329013						-0.0368853
							0.0195956	-0.00504022				-0.0321847		-0.00668159			0.0616569											-0.0253059						-0.0344859
							-0.00335364	0.089486				-0.029805		-0.00668159			0.0616569											-0.0577579						0.0183913
							0.00663058	0.0109034				-0.029805		-0.00668159			0.0642041											-0.0133128						-0.0629136
							0.0195956	0.0215397				-0.029805		-0.0070049			0.0717572											-0.0577579						-0.0320997
							0.0444191	0.0453893				-0.029805		-0.00752933			0.084061											0.0160868						-0.0320997
							-0.00504022	-0.0537531				-0.029805		-0.00796893			-0.182697											-0.00827253						-0.0503245
							0.0368131	-0.0253577				-0.029805		-0.00796893			-0.0867861											-0.00827253						-0.0490854
							0.0227772	-0.0226177				-0.029805		-0.00796893			-0.0768929											-0.0484975						-0.0654759
							0.0163904	-0.0198948				-0.0274382		-0.00848811			-0.0710634											-0.05403						0.0226078
							0.0548487	-0.0131614				-0.0274382		-0.00891243			-0.0503339											0						-0.0226837
							0.0227772	-0.0118272				-0.0274382		-0.00893182			-0.0503339											-0.0150059						0.0420953
							0.0227772	-0.0104971				-0.0274382		-0.00931142			-0.0323108											-0.0323108						-0.0641929
							0.0179959	-0.00784891				-0.0274382		-0.00994611			-0.0235722											-0.0116262						0.0247008
							0.0563184	-0.00390672				-0.0274382		-0.0100613			-0.0150059											-0.0305489						0.0173308
							0.0259357	-0.00129834				-0.0274382		-0.0106581			-0.0133128																	-0.00668159
							0.0195956	0.00129447				-0.0274382		-0.0106581			-0.0116262																	0.00875182
							0.0548487	0.00387189				-0.0274382		-0.0111938			-0.00329013																	0.0119888
							0.0163904	0.00387189				-0.0274382		-0.0116262			-0.00329013																	-0.0466178
							0.0474246	0.00643411				-0.0274382		-0.0120089			-0.00329013																	-0.0466178
							0.0577831	0.0102493				-0.0274382		-0.0120089			0																	-0.103441
							0.0179959	0.0152847				-0.0274382		-0.0123292			0.00163576																	-0.093681
							0.0179959	0.0202623				-0.0250843		-0.0123292			0.00650641																	-0.0872942
							0.0413927	0.0288382				-0.0250843		-0.0123337			0.011323																	-0.081
							0.0352758	0.0360566				-0.0250843		-0.0127952			0.0176632																	-0.0732584
							-0.0240382	-0.0681158				-0.0250843		-0.0127952			0.0192339																	-0.0732584
							-0.00335364	-0.0319692				-0.0250843		-0.013364			0.0207989																	-0.0717265
							0.0874538	-0.02007				-0.0250843		-0.013364			0.0331202																	-0.0717265
							0.0577831	-0.0113548				-0.0227431		-0.0134676			0.037652																	-0.0717265
							0.0504095	-0.00848811				-0.0227431		-0.0134676			0.0436217																	-0.0701999
							0.0352758	0.0205217				-0.0227431		-0.0134676			0.0436217																	-0.0686788
							0.0259357	0.0451967				-0.0227431		-0.0137883			0.0638925																	-0.0686788
							0.0489196	0.0531949				-0.0227431		-0.0142404			0.0791812																	-0.0671629
							-0.0205217	0.0317144				-0.0227431		-0.0147233			-0.0845596																	-0.0671629
							-0.0170333	-0.00396619				-0.0227431		-0.0147233			-0.0420613																	-0.0671629
							0.0243593	0.0167802				-0.0204145		-0.0150059			-0.0420613																	-0.0671629
							0.0227772	-0.0313756				-0.0204145		-0.0157533			-0.031158																	-0.0656523
							0.0119888	-0.0215843				-0.0204145		-0.0157533			-0.0275835																	-0.0626468
							0.0152019	0.0329361				-0.0204145		-0.0158423			-0.0240382																	-0.0611518
							0.0400847	0.0317144				-0.0204145		-0.0158423			-0.0101396																	-0.0611518
							0.0470816	-0.00931142				-0.0204145		-0.0158423			-0.00673338																	-0.0611518
							0.048072	0.0129168				-0.0204145		-0.0158423			-0.00673338																	-0.0566975
							0.0607459	0.0361466				-0.0204145		-0.015923			-0.00673338																	-0.0566975
							0.0702494	0.0300725				-0.0204145		-0.0167057			-0.00335364																	-0.0537531
							0.0711884	-0.035856				-0.0204145		-0.0167057			-0.0845596																	-0.0522884
							0.0786284	0.0145047				-0.0180982		-0.0169008			0.00663058																	-0.0522884
							-0.0686788	0.0524253				-0.0180982		-0.0170333			0.00990829																	-0.0508285
							-0.0436022	0.0270032				-0.0180982		-0.0170333			0.0163904																	-0.0508285
							-0.0393234	-0.0150059				-0.0180982		-0.0171454			0.0195956																	-0.0508285
							-0.0295005	0.031599				-0.0180982		-0.0171454			0.0259357																	-0.0508285
							-0.0239855	0.037652				-0.0157943		-0.0171889			0.0290714																	-0.0508285
							-0.0198948	0.0239122				-0.0157943		-0.0174547			0.038345																	-0.0479236
							-0.0198948	0.0406471				-0.0157943		-0.0174547			0.038345																	-0.0479236
							-0.0171889	0.0638925				-0.0157943		-0.0180512			0.0474246																	-0.0464783
							0	0.0192339				-0.0157943		-0.0180512			0.0592429																	-0.0436022
							0.00643411	-0.0116262				-0.0135025		-0.0180512			-0.0686204																	-0.0436022
							0.0489865	0.0239122				-0.0135025		-0.0184122			0.0679002																	-0.0393234
							-0.0664801					-0.0112227		-0.0185398			0.0679002																	-0.0379064
							-0.0380434					-0.0112227		-0.0185398			-0.0647253																	-0.0364941
							-0.0274687					-0.0112227		-0.0188269			-0.0647253																	-0.0350863
							-0.0230144					-0.0112227		-0.0195421			-0.0532455																	-0.0350863
							-0.0230144					-0.00895484		-0.0195421			-0.0494854																	-0.0336831
							-0.0113548					-0.00895484		-0.0198948			-0.0457575																	-0.0336831
							-0.00848811					-0.00895484		-0.0201254			-0.0420613																	-0.0322844
							-0.00140321					-0.00895484		-0.0201254			-0.11115																	-0.0322844
							0.00556795					-0.00895484		-0.0202034			-0.107546																	-0.0295005
							0.00832539					-0.00669876		-0.0203613			-0.091688																	-0.0281152
							0.0151433					-0.00669876		-0.0205217			-0.0848215																	-0.0267343
							0.0164942					-0.00669876		-0.0218453			-0.079742																	-0.0226177
							0.0362682					-0.00445434		-0.0218453			-0.0747212																	-0.0226177
							0.0439324					-0.00445434		-0.0222764			-0.0747212																	-0.0198948
							-0.0243593					-0.00222146		-0.0226837			-0.0714059																	-0.0158423
							-0.0174547					-0.00222146		-0.0226837			-0.0632269																	-0.0131614
							-0.00663058					-0.00222146		-0.0229696			-0.055199																	-0.00521681
							-0.0026401					0		-0.0229696			-0.0536111																	-0.00260057
							-0.00131804					0		-0.0235722			-0.052029																	0.00258509
							0					0.00221015		-0.0240382			-0.0411126																	0.0102493
							0.00131405					0.00221015		-0.0243593			-0.0349957																	0.0140313
							0.00262414					0.00221015		-0.0243593			-0.0334798																	0.0190232
							0.00262414					0.00221015		-0.0243593			-0.0304639																	0.0264052
							0.00393029					0.00440912		-0.0244246			-0.0215397																	-0.0763883
							0.00523253					0.00659701		-0.025143			-0.0186052																	-0.0664801
							0.00782534					0.00659701		-0.0253059			-0.0171454																	-0.0536111
							0.0104028					0.00659701		-0.0253059			-0.0142404																	-0.0536111
							0.0180445					0.01094		-0.0253059			-0.0142404																	-0.0488819
							0.0230653					0.0173741		-0.0253059			-0.00991907																	-0.0380434
							0.0230653					0.0173741		-0.0257536			-0.00991907																	-0.0349957
							0.0425874					0.0173741		-0.0257536			-0.00991907																	-0.0289637
							0.0425874					0.0194978		-0.0257536			0																	-0.0230144
							0.0449671					0.0237143		-0.0258073			0.0013987																	-0.0215397
							0.0555173					0.0381577		-0.0258073			0.00418264																	-0.0171454
							0.0145047					0.0401824		-0.0258073			0.00418264																	-0.0156905
							0.109509					0.0618524		-0.0270465			0.00969757																	-0.0142404
							0.037652					0.0769598		-0.0271522			0.0110654																	-0.154902
							0.0667126					-0.0952169		-0.0273662			0.0137883																	-0.0855446
							0.061054					-0.0885095		-0.0280287			0.0151433																	-0.0807634
							0.0223583					-0.0851942		-0.0280287			0.0178408																	-0.0776049
							0.011323					-0.0778262		-0.0281152			0.0205217																	-0.0776049
							0.0391521					-0.0753977		-0.0289637			0.0271522																	-0.0744691
							0.0524253					-0.0745912		-0.0299632			0.0310825																	-0.0698076
							0.00326539					-0.0737862		-0.0309115			-0.093681																	-0.0667275
							0.0145047					-0.0721807		-0.0309115			-0.081																	-0.0636691
							0.0567611					-0.0673994		-0.0309337			-0.0763385																	-0.0621479
							0.0750647					-0.0658173		-0.031158			-0.0717265																	-0.060632
							0.011323					-0.0658173		-0.0320997			-0.0701999																	-0.0561159
							0.0223583					-0.0650284		-0.0320997			-0.0701999																	-0.0516463
							0.0638925					-0.0642409		-0.0320997			-0.0656523																	-0.0472222
							0.0391521					-0.0634548		-0.0320997			-0.064147																	-0.0413927
							0.0553206					-0.0634548		-0.0320997			-0.0522884																	-0.038507
							0.0239122					-0.0611052		-0.0323108			-0.0493736																	-0.038507
							0.0709087					-0.0611052		-0.0323108			-0.040745																	-0.038507
							0.0451015					-0.0603248		-0.0323935			-0.0336831																	-0.0370713
							0.0495106					-0.0595458		-0.032452			-0.0253577																	-0.0356404
							0.0239122					-0.0587682		-0.0327925			-0.0226177																	-0.0356404
							0.0391521					-0.0579919		-0.0329563			-0.0212541																	-0.0356404
							0.0667126					-0.0579919		-0.0332912			-0.0158423																	-0.0299632
							0.0538754					-0.0572171		-0.0334798			-0.00784891																	-0.0271522
							0.0667126					-0.0556716		-0.0338583			-0.00784891																	-0.0271522
							0.0872991					-0.0549009		-0.0350863			-0.00129834																	-0.0257536
							0.00163576					-0.0549009		-0.0350863			0.00387189																	-0.0243593
							0.042137					-0.0549009		-0.0356404			0.0127743																	-0.0243593
							0.0495106					-0.0541315		-0.0356404			0.0165344																	-0.0202034
							0.037652					-0.0533635		-0.035684			0.0214979																	-0.0174547
							0.0176632					-0.0525969		-0.0365754			0.0239585																	-0.013364
							0.0465761					-0.0518316		-0.0368853			0.0264052																	-0.0120089
							0.0160868					-0.0510677		-0.03809			0.0288382																	-0.0120089
							0.0819041					-0.0510677		-0.0392981			0.0324624																	-0.0106581
							0.0624756					-0.0510677		-0.0393234			0.0384363																	-0.0106581
							0.0192339					-0.0510677		-0.0397671			0.050143																	-0.00796893
												-0.0510677		-0.0400052			0.138656																	-0.00663058
												-0.0503051		-0.040225			-0.0636691																	-0.00396619
												-0.0495439		-0.040225			-0.0591215																	-0.00396619
												-0.0487839		-0.0413927			-0.0501666																	-0.00131804
												-0.0472681		-0.0417243			-0.0327925																	0.00131405
												-0.0472681		-0.0417243			-0.0285555																	0.00131405
												-0.0442521		-0.0419142			-0.0243593																	0.00262414
												-0.0420038		-0.0430346			-0.0160868																	0.00262414
												-0.041257		-0.0436022			-0.00596295																	0.00393029
												-0.0405114		-0.0438316			0																	0.00523253
												-0.0397671		-0.0441642			0.00196959																	0.00653087
												-0.0397671		-0.0442521			0.00393029																	0.00653087
												-0.0390241		-0.0442977			0.0211893																	0.0104028
												-0.0390241		-0.044848			0.0286452																	0.012965
												-0.0390241		-0.0450379			0.0323257																	0.0205622
												-0.0368026		-0.0457575			0.0323257																	0.0267932
												-0.0368026		-0.0457575			0.0413927																	0.0304893
												-0.0309337		-0.0466689			0.0413927																	0.0317144
												-0.0302056		-0.0476174			0.0449671																	0.0329361
												-0.0280287		-0.0501666			0.0449671																	0.0377886
												-0.0258627		-0.0508285			0.0467434																	0.0377886
												-0.025143		-0.052178			0.0467434																	0.0401946
												-0.025143		-0.0535477			0.0555173																	0.0543577
												-0.0237073		-0.0535477			0.0555173																	-0.0577579
												-0.0237073		-0.0537531			0.0606978																	-0.0503339
												-0.0237073		-0.054621			0.0658173																	-0.0503339
												-0.0229913		-0.0553165			0.0808232																	-0.0430346
												-0.0215627		-0.0553165			0.0953279																	-0.0412288
												-0.0180116		-0.05589			0.0953279																	-0.0394305
												-0.0180116		-0.0574959			-0.0577579																	-0.0376396
												-0.0173049		-0.0590984			-0.05589																	-0.0376396
												-0.0158948		-0.0590984			-0.052178																	-0.0340798
												-0.0103		-0.0594835			-0.0503339																	-0.0340798
												-0.000679116		-0.061518			-0.044848																	-0.0340798
												0		-0.0621479			-0.0394305																	-0.0287942
												0.00337974		-0.0675262			-0.0394305																	-0.0270465
												-0.0732545		-0.0675262			-0.0376396																	-0.0253059
												-0.0706461		-0.0693477			-0.0340798																	-0.0253059
												-0.0693477		-0.0693477			-0.0340798																	-0.0253059
												-0.0667626		-0.0697835			-0.0340798																	-0.0218453
												-0.0654759		-0.0716041			-0.0287942																	-0.0218453
												-0.0616382		-0.0716041			-0.0253059																	-0.0133128
												-0.0603664		-0.0719483			-0.0235722																	-0.0116262
												-0.0578341		-0.0736576			-0.0235722																	-0.00994611
												-0.0553165		-0.0736576			-0.0201254																	-0.00827253
												-0.0553165		-0.0776049			-0.0167057																	-0.00827253
												-0.0540631		-0.0819697			-0.0150059																	-0.00660537
												-0.0540631		-0.0825092			-0.0116262																	-0.00494458
												-0.0528133		-0.0840728			-0.00827253																	-0.00494458
												-0.0528133		-0.0840728			-0.00660537																	-0.00329013
												-0.0528133		-0.0861861			-0.00660537																	-0.00164195
												-0.0528133		-0.0861861			-0.00494458																	0.00163576
												-0.0528133		-0.0872942			-0.00329013																	0.00488892
												-0.0515671		-0.090444			-0.00329013																	0.00488892
												-0.0515671		-0.0925886			-0.00164195																	0.00650641
												-0.0515671		-0.094744			-0.00164195																	0.00650641
												-0.0490854		-0.096082			-0.00164195																	0.00811789
												-0.0490854		-0.179445			0																	0.011323
												-0.0478499		-0.180208			0																	0.0129168
												-0.0478499		-0.181977			0.00163576																	0.0129168
												-0.0466178		-0.195359			0.00163576																	0.0129168
												-0.0466178		-0.197937			0.00488892																	0.0160868
												-0.0453893		-0.216316			0.011323																	0.0176632
												-0.0453893		-0.221849			0.0129168																	0.0192339
												-0.0441642					0.0129168																	0.0223583
												-0.0429426					0.0129168																	0.0223583
												-0.0417243					0.0160868																	0.0495106
												-0.0392981					0.0176632
												-0.03809					0.0192339
												-0.03809					0.0207989
												-0.03809					0.0207989
												-0.0344859					0.0223583
												-0.0344859					0.0223583
												-0.0344859					0.0239122
												-0.0344859					0.0254604
												-0.0344859					0.0254604
												-0.0332912					0.0254604
												-0.0309115					0.0254604
												-0.0297265					0.0254604
												-0.0297265					0.0270032
												-0.0285447					0.031599
												-0.0273662					0.031599
												-0.0273662					0.031599
												-0.0273662					0.031599
												-0.0261908					0.031599
												-0.0261908					0.031599
												-0.0261908					0.031599
												-0.0261908					0.0331202
												-0.0250186					0.0331202
												-0.0250186					0.037652
												-0.0250186					0.0391521
												-0.0250186					0.0391521
												-0.0250186					0.0436217
												-0.0250186					0.0436217
												-0.0226837					0.0451015
												-0.0226837					0.0465761
												-0.0226837					0.0465761
												-0.0226837					0.0495106
												-0.0226837					0.0495106
												-0.0226837					0.0495106
												-0.0215209					0.0538754
												-0.0215209					0.0567611
												-0.0203613					0.0624756
												-0.0203613					0.0624756
												-0.0203613					0.0667126
												-0.0192047					0.0736838
												-0.0192047					0.0791812
												-0.0192047
												-0.0180512
												-0.0169008
												-0.0169008
												-0.0169008
												-0.0169008
												-0.0169008
												-0.0169008
												-0.0157533
												-0.0134676
												-0.0134676
												-0.0123292
												-0.0123292
												-0.0123292
												-0.0123292
												-0.0100613
												-0.0100613
												-0.00780525
												-0.00780525
												-0.00668159
												-0.00668159
												-0.00668159
												-0.00668159
												-0.00668159
												-0.00668159
												-0.00444295
												-0.00221579
												-0.00221579
												-0.00221579
												-0.00110648
												-0.00110648
												0.00110367
												0.00110367
												0.00220455
												0.00330264
												0.00439796
												0.00439796
												0.00549052
												0.00549052
												0.00549052
												0.00658035
												0.00658035
												0.00766744
												0.00875182
												0.0098335
												0.0098335
												0.0109125
												0.0141335
												0.0162676
												0.0162676
												0.0194493
												0.0205047
												0.0205047
												0.0236555
												0.0247008
												0.0247008
												0.0257435
												0.0339964
												-0.129348
												-0.11884
												-0.117113
												-0.110274
												-0.108581
												-0.101873
												-0.100213
												-0.0985582
												-0.0952681
												-0.0952681
												-0.0920027
												-0.0871502
												-0.083945
												-0.083945
												-0.083945
												-0.0823513
												-0.0823513
												-0.0807634
												-0.0791812
												-0.0776049
												-0.0760342
												-0.0760342
												-0.0744691
												-0.0744691
												-0.0744691
												-0.0713559
												-0.0698076
												-0.0698076
												-0.0698076
												-0.0698076
												-0.0682648
												-0.0667275
												-0.0651956
												-0.0651956
												-0.0651956
												-0.0636691
												-0.0636691
												-0.0636691
												-0.0621479
												-0.0591215
												-0.0591215
												-0.0576161
												-0.0576161
												-0.0561159
												-0.0561159
												-0.054621
												-0.054621
												-0.054621
												-0.054621
												-0.054621
												-0.054621
												-0.0531311
												-0.0516463
												-0.0516463
												-0.0516463
												-0.0501666
												-0.0501666
												-0.0501666
												-0.0501666
												-0.0486919
												-0.0486919
												-0.0472222
												-0.0472222
												-0.0472222
												-0.0472222
												-0.0457575
												-0.0457575
												-0.0457575
												-0.0442977
												-0.0442977
												-0.0442977
												-0.0442977
												-0.0428428
												-0.0413927
												-0.0399474
												-0.0399474
												-0.0399474
												-0.038507
												-0.038507
												-0.038507
												-0.0342141
												-0.0327925
												-0.0327925
												-0.0327925
												-0.0299632
												-0.0299632
												-0.0299632
												-0.0285555
												-0.0271522
												-0.0271522
												-0.0257536
												-0.0257536
												-0.0243593
												-0.0229696
												-0.0215843
												-0.0202034
												-0.0202034
												-0.0174547
												-0.0174547
												-0.0174547
												-0.0160868
												-0.0160868
												-0.0160868
												-0.0147233
												-0.0147233
												-0.013364
												-0.013364
												-0.013364
												-0.0120089
												-0.00796893
												-0.00796893
												-0.00796893
												-0.00663058
												-0.00396619
												-0.0026401
												-0.0026401
												-0.0026401
												-0.0026401
												-0.00131804
												0
												0
												0.00131405
												0.00393029
												0.00653087
												0.00653087
												0.00911596
												0.0116858
												0.0155122
												0.0218155
												0.0377886
												0.0635494
												-0.21642
												-0.172826
												-0.074941
												-0.0710634
												-0.0691374
												-0.06722
												-0.065311
												-0.065311
												-0.0634104
												-0.061518
												-0.0596339
												-0.05589
												-0.05589
												-0.05403
												-0.0484975
												-0.0484975
												-0.0466689
												-0.044848
												-0.044848
												-0.044848
												-0.0430346
												-0.0430346
												-0.0430346
												-0.0430346
												-0.0394305
												-0.0394305
												-0.0394305
												-0.0376396
												-0.0376396
												-0.0376396
												-0.035856
												-0.0340798
												-0.0323108
												-0.0305489
												-0.0287942
												-0.0270465
												-0.0253059
												-0.0235722
												-0.0235722
												-0.0184122
												-0.0184122
												-0.0167057
												-0.0150059
												-0.0150059
												-0.0116262
												-0.0116262
												-0.0116262
												-0.0116262
												-0.0116262
												-0.00994611
												-0.00994611
												-0.00494458
												-0.00329013
												0
												0
												0
												0.00163576
												0.00326539
												0.00650641
												0.00972342
												0.0176632
												0.0207989
												0.0239122
												0.0239122
												0.0270032
												0.0285406
												0.0331202
												0.0451015
												-0.224642
												-0.213576
												-0.210853
												-0.205458
												-0.202786
												-0.202786
												-0.200129
												-0.194865
												-0.189664
												-0.09691
												-0.0825349
												-0.0805196
												-0.0785136
												-0.0725507
												-0.0705811
												-0.0705811
												-0.0686204
												-0.0589475
												-0.0589475
												-0.0570385
												-0.0570385
												-0.0551379
												-0.0551379
												-0.0532455
												-0.0532455
												-0.0532455
												-0.0494854
												-0.0494854
												-0.0494854
												-0.0439055
												-0.0439055
												-0.0439055
												-0.0439055
												-0.0439055
												-0.0420613
												-0.0383964
												-0.0365754
												-0.0347621
												-0.0347621
												-0.0329563
												-0.0293671
												-0.0293671
												-0.0275835
												-0.0275835
												-0.0258073
												-0.0240382
												-0.0170333
												-0.0135728
												-0.00504022
												0.0049824
												0.0131614
												0.0504095
												-0.100163
												-0.082565
												-0.081
												-0.0778868
												-0.0732584
												-0.0717265
												-0.0717265
												-0.0717265
												-0.0717265
												-0.0686788
												-0.064147
												-0.0611518
												-0.0611518
												-0.059662
												-0.059662
												-0.0522884
												-0.0508285
												-0.0508285
												-0.0493736
												-0.0479236
												-0.0479236
												-0.0479236
												-0.0479236
												-0.0464783
												-0.0464783
												-0.0464783
												-0.0450379
												-0.0450379
												-0.0450379
												-0.0450379
												-0.0450379
												-0.0436022
												-0.040745
												-0.0393234
												-0.0393234
												-0.0379064
												-0.0379064
												-0.0364941
												-0.0364941
												-0.0364941
												-0.0364941
												-0.0350863
												-0.0350863
												-0.0308902
												-0.0295005
												-0.0281152
												-0.0267343
												-0.0267343
												-0.0253577
												-0.0253577
												-0.0239855
												-0.0239855
												-0.0226177
												-0.0226177
												-0.0212541
												-0.0198948
												-0.0198948
												-0.0185398
												-0.0158423
												-0.0118272
												-0.00917096
												-0.00917096
												-0.00917096
												-0.00521681
												-0.00129834
												-0.00129834
												0.00515489
												0.0115136
												0.0202623
												-0.11845
												-0.0882412
												-0.079742
												-0.079742
												-0.0780619
												-0.0616094
												-0.0616094
												-0.0599979
												-0.0583924
												-0.055199
												-0.0536111
												-0.0536111
												-0.0536111
												-0.052029
												-0.052029
												-0.0504526
												-0.0504526
												-0.0457575
												-0.0426554
												-0.0411126
												-0.0411126
												-0.0395753
												-0.0395753
												-0.0334798
												-0.0304639
												-0.0289637
												-0.0259788
												-0.0171454
												-0.0156905
												-0.0156905
												-0.0142404
												-0.0113548
												-0.00991907
												-0.00564027
												-0.00281098
												-0.00281098
												-0.00281098
												-0.00140321
												0.0013987
												0.00694886
												-0.060632
												-0.0591215
												-0.0399474
												-0.038507
												-0.0313756
												-0.0285555
												-0.0285555
												-0.0243593
												-0.0215843
												-0.0215843
												-0.0215843
												-0.0215843
												-0.0202034
												-0.0174547
												-0.0174547
												-0.0160868
												-0.0147233
												-0.0120089
												-0.00931142
												-0.00931142
												-0.00931142
												-0.00663058
												-0.00396619
												-0.00396619
												0.00131405
												0.00523253
												0.00653087
												0.00653087
												0.00911596
												0.00911596
												0.00911596
												0.00911596
												0.00911596
												0.0104028
												0.0104028
												0.0155122
												0.0167802
												0.0180445
												0.0180445
												0.0180445
												0.0230653
												0.0243115
												0.0255541
												0.0280287
												0.0304893
												0.0317144
												0.0329361
												0.0353691
												0.0377886
												0.0389933
												0.0389933
												0.0401946
												0.0413927
												0.0425874
												0.0449671
												0.0543577
												0.0589779
												0.0658173
												0.0921462
												-0.0989634
												-0.0928321
												-0.0867861
												-0.074941
												-0.0710634
												-0.0596339
												-0.0596339
												-0.052178
												-0.0484975
												-0.0466689
												-0.0466689
												-0.0466689
												-0.0430346
												-0.0430346
												-0.0430346
												-0.0430346
												-0.0412288
												-0.0412288
												-0.0412288
												-0.0412288
												-0.0394305
												-0.0394305
												-0.0376396
												-0.0376396
												-0.035856
												-0.035856
												-0.035856
												-0.0340798
												-0.0340798
												-0.0340798
												-0.0340798
												-0.0323108
												-0.0323108
												-0.0323108
												-0.0323108
												-0.0323108
												-0.0323108
												-0.0323108
												-0.0323108
												-0.0323108
												-0.0305489
												-0.0287942
												-0.0287942
												-0.0287942
												-0.0270465
												-0.0253059
												-0.0253059
												-0.0253059
												-0.0253059
												-0.0253059
												-0.0253059
												-0.0253059
												-0.0253059
												-0.0235722
												-0.0218453
												-0.0218453
												-0.0201254
												-0.0201254
												-0.0184122
												-0.0184122
												-0.0184122
												-0.0184122
												-0.0184122
												-0.0133128
												-0.0133128
												-0.0133128
												-0.0133128
												-0.0133128
												-0.0133128
												-0.0133128
												-0.0133128
												-0.0133128
												-0.0116262
												-0.0116262
												-0.0116262
												-0.00994611
												-0.00994611
												-0.00994611
												-0.00994611
												-0.00994611
												-0.00994611
												-0.00827253
												-0.00827253
												-0.00827253
												-0.00827253
												-0.00827253
												-0.00827253
												-0.00660537
												-0.00660537
												-0.00660537
												-0.00494458
												-0.00494458
												-0.00494458
												-0.00494458
												-0.00494458
												-0.00329013
												-0.00164195
												-0.00164195
												0
												0
												0
												0
												0
												0.00163576
												0.00326539
												0.00326539
												0.00326539
												0.00326539
												0.00326539
												0.00488892
												0.00488892
												0.00650641
												0.00650641
												0.00650641
												0.00811789
												0.00811789
												0.00972342
												0.00972342
												0.00972342
												0.011323
												0.0129168
												0.0129168
												0.0145047
												0.0145047
												0.0145047
												0.0160868
												0.0160868
												0.0160868
												0.0176632
												0.0176632
												0.0192339
												0.0192339
												0.0207989
												0.0207989
												0.0223583
												0.0254604
												0.0254604
												0.0270032
												0.0285406
												0.031599
												0.031599
												0.0567611

## Sheet: Table G. Goat measurements
File S2. Table G. LSI data for Capra hircus/aegagrus
Author/Reference for published data	Kersten 1987	Açikkol 2006	Arbuckle	Arbuckle and Özkaya 2006	Arbuckle and Erek 2012	Helmer 1988	Atici	Atici	Payne 1985; Buitenhuis and Caneva 1998	Russell et al.	Russell et al.	Russell et al.	Marciniak	Orton and Frame	Arbuckle	Arbuckle	Arbuckle	De Cupere	De Cupere	De Cupere	De Cupere	Çakırlar	Çakırlar	Çakırlar	Galik	Buitenhuis and Caneva 1998	Kansa	Boessneck and von den Driesch 1979	Galik	Gourichon and Helmer	Gourichon and Helmer	Buitenhuis	Buitenhuis	Buitenhuis	Buitenhuis	Peters and Pöllath
site	Ksar Akil	Üçagızlı*	Hallan Çemi	Körtik	Direkli	Cafer	Karain	Öküzini	Aşıklı	Çatalhöyük EARLY	Çatalhöyük MIDDLE	Çatalhöyük LATE	Çatalhöyük TP	Çatalhöyük West	Köşk II-V	Suberde	Erbaba	Bademağacı ENI	Bademağacı ENII	Bademağacı LN/EC	Höyücek	Ulucak VI	Ulucak V	Ulucak IV	Çukurici	Yumuktepe	Domuztepe	Fikirtepe	Barcın	Menteşe Middle	Menteşe Late	Ilipinar X	Ilipinar IX	Ilipinar VIII	Ilipinar VI-IV	Pendik
	-0.0241337	-0.0522396	0.0525291	0.0234144	-0.0148916	-0.0103	-0.0803566	-0.0947148	-0.0154661	-0.0687601	-0.0982307	-0.118385	-0.139844	-0.0953617	-0.132117	-0.0682648		-0.0772004	-0.134699		-0.0688813	-0.117183	-0.126365			-0.0450784		-0.100238	-0.0362122	-0.0719768	-0.0984419	-0.0923465	-0.149298		-0.134699	0.00363428
	-0.0241337	-0.0322929	0.124551	0.0147233	-0.00317005	-0.00272286	-0.0799118	-0.0922816	0.0329076	-0.0558188	-0.0960318	-0.118385	-0.119975	-0.0953084	-0.125981	-0.0630517	-0.132835	-0.0746336	-0.121044	-0.103376		-0.106099	-0.120688	-0.135995	-0.142195	-0.0689873	-0.141049	-0.0878304	-0.0279338	-0.0527064	-0.0921111	-0.0922816	-0.142668	-0.143143	-0.133981	-0.0522235
	-0.0241337	-0.0276234	-0.00877392	-0.00214467	-0.00313571	0	-0.075547	-0.0862816	0.0314085	-0.0132417	-0.0796093	-0.107905	-0.0949755	-0.0900121	-0.125981	-0.0180116	-0.121044	-0.0449117	-0.119324	-0.101588	-0.0691259	-0.106099	-0.106894	-0.131064	-0.126071	-0.0623133	-0.135879	-0.0838475	-0.0588667	-0.0509587	-0.0752862	-0.0831702	-0.137528	-0.132448	-0.112997	-0.0770471
	0.0198948	-0.0161003	0.0542318		-0.00294438	0.00673338	-0.0697946	-0.074246	0.0672523		-0.0774719	-0.10067	-0.0788297	-0.085459	-0.097981	-0.0165993	-0.11369	-0.0431569	-0.118385	-0.0819329	-0.0502411	-0.0953617	-0.0911322	-0.102488	-0.102273		-0.13411	-0.0777597	-0.0157943	-0.0355935	-0.0691259	-0.0712256	-0.131927	-0.130273	-0.109499	-0.0157943
	0.02007	0.0257344	0.0329481		0.0046284	0.013364	-0.0496878	-0.0641175	0.0208836		-0.0698229	-0.0911322	-0.0687601	-0.0854302	-0.089052	0.00725857	-0.110412	-0.0424373	-0.108623	-0.0782679	-0.0599078	-0.0912329	-0.0893569	-0.0984419	-0.0905344	-0.0120885	-0.125371	-0.075547	-0.0440375	-0.0342349	-0.0645843	-0.0645069	-0.131837	-0.118865	-0.106894	-0.049218
	0.02007	0.0273496	0.0579919		0.0124537	0.013364	-0.0461632	-0.0527064	0.0475823		-0.0555173	-0.0861861	-0.0595228	-0.0846525	-0.0847796	0.0263289	-0.0986098	-0.0386956	-0.103376	-0.0760599	-0.102419	-0.0881005	-0.0863354	-0.0828462	-0.0873225		-0.123362	-0.0746336			-0.0555173	-0.0518316	-0.130273	-0.116506	-0.104624
	0.0263289	0.0360653			0.0139856	0.0237667	-0.0461632	-0.0513305	0.0489458		-0.0524983	-0.078452	-0.0522235	-0.0801751	-0.0819758	0.0276044	-0.0885095	-0.0371418	-0.0975626	-0.067455	-0.0488775	-0.0874763	-0.085629	-0.0789366	-0.0861861		-0.123362	-0.0746336			-0.0125891	-0.0474843	-0.129095	-0.114918	-0.10307
	0.0263289	0.0372687			0.0159881	0.0263289	-0.0434657	-0.0394506			-0.0524983	-0.0779422	-0.0474843	-0.076447	-0.0811793	0.0436645	-0.0874763	-0.0280287	-0.09691	-0.0449671		-0.0744999	-0.0831702	-0.0776049	-0.0854302		-0.115112	-0.0656788			0.0302479	-0.0389181	-0.128624	-0.114066	-0.09691
	0.0301441	0.0374826			0.0364293	0.0263289	-0.0389181	-0.0379831			-0.0439196	-0.0770471	-0.0450449	-0.0743022	-0.0804493	0.0492926	-0.0839019	-0.0241948	-0.0952556	-0.0379831		-0.0615518	-0.078452	-0.0772004	-0.0707636		-0.112997	-0.0613065				-0.0353059	-0.128624	-0.112704	-0.09691
	0.0301441	0.0379108			0.0373817	0.0364293	-0.0381444	-0.0337687			-0.0439196	-0.0746336	-0.0443921	-0.0711492	-0.0800965	0.0597682	-0.0819758	-0.018917	-0.0943094	-0.0264179		-0.0526222	-0.0779422	-0.0761817	-0.0660519		-0.111099	-0.061054				-0.0135921	-0.128519	-0.112478	-0.0947863
	0.0314085	0.0555967			0.0405144	0.0389181	-0.0348655	-0.0330526			-0.0403243	-0.0744999	-0.0440375	-0.0702214	-0.0800965	0.066772	-0.08167	-0.0164381	-0.092692	0.00755314		-0.0488775	-0.0774647	-0.0741017	-0.0629909		-0.110453	-0.0600462				0.00247462	-0.125767	-0.110953	-0.0848455
	0.0326691	0.0597459			0.0416766	0.0389181	-0.0341543	-0.0321847			-0.0389181	-0.0727763	-0.0437233	-0.0693265	-0.0770471	0.0676433	-0.07684	-0.0159525	-0.0893569	0.0289178		-0.040267	-0.0719676	-0.0694499	-0.0579919		-0.107905	-0.0569049				0.0158386	-0.125652	-0.107749	-0.0848455
	0.0338583	0.0605307			0.0434657	0.0389181	-0.0324858	-0.0287424			-0.0347621	-0.0719676	-0.0410258	-0.0676593	-0.0728961	0.075251	-0.0743667	-0.00209299	-0.086267	0.0362643		-0.037563	-0.0588453	-0.0688813	-0.0486194		-0.106744	-0.0483047					-0.125652	-0.106894	-0.0831702
	0.0364293	0.0631691			0.0458999	0.0426247	-0.0321847	-0.0255541			-0.0290903	-0.0716619	-0.0406179	-0.0669468	-0.0719676	0.132186	-0.074246	0.0120228	-0.0847796	0.0601872		-0.0338583	-0.0560738	-0.0685623	-0.0485237		-0.10667	-0.045323					-0.125347	-0.10067	-0.0831115
	0.0389181	0.0632021			0.0472749	0.0450784	-0.0321847	-0.0241948			-0.0264627	-0.0710295	-0.0141887	-0.0669468	-0.0684265		-0.0698912	0.0774897	-0.0847796	0.0636691		-0.0289217	-0.0544611	-0.0673548	-0.0397171		-0.105902	-0.0407849					-0.123362	-0.09691	-0.08167
	0.0419259	0.0805604			0.0473169	0.0511525	-0.0310342	-0.0241948			-0.0259561	-0.0697946	-0.00646604	-0.0669468	-0.0638336		-0.0645623	0.0801583	-0.082242	0.0697738		-0.0239122	-0.0527064	-0.0669468	-0.0211893		-0.104735	-0.040255					-0.117259	-0.0923465	-0.0772004
	0.0419259	0.0896528			0.0554313	0.0511525	-0.0283336	-0.0224685			-0.0130298	-0.0697946	0.0350927	-0.065141	-0.0603932		-0.0625377		-0.0819329	0.0897314		0.0131796	-0.0509587	-0.064458			-0.104209	-0.0317144					-0.116654	-0.0863354	-0.0737379
	0.0450784	0.112173			0.0601872	0.0511525	-0.0264627	-0.0222764			0.0105673	-0.0687601	0.0442037	-0.0627097	-0.0602294		-0.059672		-0.0806424	0.130597		0.0271154	-0.0502411	-0.0627097			-0.104143	0.00723841					-0.115659	-0.0813765	-0.0731071
	0.0450784	*LSI values represent mean values for 18 different skeletal measurements (N=168)			0.0607789	0.0511525	-0.0250383	-0.0211893			0.0182248	-0.0673548	0.0485298	-0.0611945	-0.0588667		-0.0596229		-0.0741017				-0.0476728	-0.0599078			-0.0984638	0.0140107					-0.114066	-0.0801751	-0.0716619
	0.0450784				0.0611052	0.0547566	-0.0241337	-0.0164381				-0.0669468		-0.0610742	-0.057076		-0.0595458		-0.0693265				-0.0475182	-0.0571239			-0.0971788	0.0216238					-0.111596	-0.0800421	-0.0713116
	0.0450784				0.0629355	0.0571429	-0.0234811	-0.0148491				-0.0669468		-0.0599264	-0.054643		-0.0564437		-0.0676593				-0.0475182	-0.054684			-0.09691	0.029455					-0.111596	-0.0799118	-0.0669468
	0.0450784				0.0657165	0.0606978	-0.0224685	-0.0130298				-0.0669468		-0.0597682	-0.0529361		-0.0538515		-0.0669468				-0.046864	-0.0543577			-0.0952925	0.040745					-0.111237	-0.0776049	-0.0666252
	0.0571429				0.0658173	0.0688813	-0.0224685	-0.0125891				-0.0655298		-0.056153	-0.0517243		-0.0529904		-0.066458				-0.0440885	-0.0496878			-0.093681						-0.111099	-0.0761264	-0.0601872
	0.0583311				0.0719768	0.0746336	-0.0222764	-0.0125891				-0.0639098		-0.0555173	-0.0464377		-0.0526222		-0.066458				-0.0440885	-0.0464747			-0.093681						-0.108919	-0.0734289	-0.0600462
	0.0595161				0.0744691	-0.0581729	-0.0186421	-0.0123387				-0.0633427		-0.0522235	-0.0371418		-0.0509943		-0.0641175				-0.0405335	-0.0406179			-0.0933647						-0.108919	-0.0731071	-0.0571239
	0.0601872				0.0759159	-0.0509943	-0.0186421	-0.00870627				-0.0633427		-0.0498175	-0.0330325		-0.0503051		-0.0639098				-0.0381796	-0.0333382			-0.0922816						-0.106317	-0.0726613	-0.0555173
	0.0601872				0.0784395	-0.0369836	-0.0174614	-0.00646604				-0.0633427		-0.0498175	-0.0310825		-0.0439324		-0.0619834				-0.0355383	-0.0265978			-0.0912329						-0.106317	-0.0697946	-0.0513077
	0.0601872				0.100336	-0.0369836	-0.0161098	-0.00624895				-0.0621479		-0.0483437	-0.0287424		-0.0431569		-0.061054				-0.0328402	-0.0241948			-0.0911322						-0.106184	-0.0682648	-0.0485504
	0.0746336				0.100997	-0.0369836	-0.0159392	-0.00624895				-0.0619834		-0.0440375	-0.0264179		-0.0425337		-0.0600462				-0.0289217	-0.0219387			-0.0907497						-0.106184	-0.0669468	-0.0372249
	0.0803108				0.110215	-0.0301441	-0.0151513	-0.00155383				-0.0615464		-0.0426782	-0.0199711		-0.041257		-0.0596052				-0.0174058	-0.0186421			-0.0893569						-0.104735	-0.0648021	-0.0255541
	0.0850108				0.113336	-0.0128499	-0.0149257	-0.00121822				-0.0603932		-0.0421232	-0.0191632		-0.0399279		-0.0585136				-0.0125891	-0.0174614			-0.0892232						-0.104624	-0.0648021	-0.0138432
	0.0850108				0.120648	-0.000633544	-0.0145884	0				-0.0599078		-0.0394506	-0.0169384		-0.0397671		-0.0579919				0.00425782	-0.0161098			-0.0888822						-0.104209	-0.0602699	-0.00960564
	0.0850108				0.133395	0.00877392	-0.0123651	0				-0.0595228		-0.0379831	-0.014156		-0.0383645		-0.0498175				0.0105673	0			-0.0887752						-0.103376	-0.0599264	0.0122345
	0.0914471				0.143606	0.0149342	-0.0123387	0.00213413				-0.0586455		-0.0370075	-0.00947589		-0.0355383		-0.0474246				0.022664	0.0167057			-0.0878753						-0.10307	-0.0582353
	0.0914471				0.16594	0.0210084	-0.0108001	0.00213413				-0.0586067		-0.0356806	-0.00492124		-0.035328		-0.0464101				0.0289637	0.0167864			-0.0872942						-0.100882	-0.0562922
	0.0914471						-0.0108001	0.00213413				-0.0585136		-0.0317144	-0.00477251		-0.035328		-0.0449117					0.0197096			-0.0872942						-0.10067	-0.0544611
	0.0947331						-0.00984279	0.00425782				-0.057076		-0.0289217	-0.0038152		-0.032867		-0.0426782					0.0249424			-0.0863598						-0.100023	-0.0529811
	0.09691						-0.00782534	0.00637118				-0.0562229		-0.0288896	0.00213413		-0.0323935		-0.0426782					0.0270582			-0.0861861						-0.0999792	-0.0499135
	0.09691						-0.0073611	0.0105673				-0.056165		-0.0287424	0.00628512		-0.0321847		-0.0410016					0.0311084			-0.0861861						-0.0988886	-0.0461632
	0.09691						-0.00612555	0.0112445				-0.054684		-0.0281942	0.0388288		-0.0303826		-0.0410016					0.0331051			-0.0861861						-0.0984419	-0.0430088
	0.09691						-0.00524834	0.0126502				-0.0529811		-0.0276234			-0.0301441		-0.040255					0.0342141			-0.0858006						-0.0984419	-0.0421232
	0.09691						-0.00499195	0.0126502				-0.0524983		-0.0258467			-0.0274382		-0.0386956					0.0610716			-0.0857121						-0.0978234	-0.0413927
	0.102305						-0.00467826	0.0131796				-0.0524983		-0.0258467			-0.0265835		-0.0382044					0.065416			-0.085629						-0.09691	-0.039355
	0.102305						-0.0024888	0.0144297				-0.051609		-0.0190232			-0.025143		-0.0348655					0.0675606			-0.0852243						-0.09691	-0.0379322
	0.104444						-0.00214467	0.0147233				-0.051609		-0.0186704			-0.025143		-0.0335411					0.0683684			-0.0835461						-0.09691	-0.0362122
	0.107634						0	0.0188398				-0.0513305		-0.0186421			-0.0222764		-0.033523								-0.0833068						-0.09691	-0.0358384
	0.107634						0	0.02007				-0.0509587		-0.0174614			-0.0204069		-0.0315301								-0.0825349						-0.09691	-0.0355383
	0.11304						0	0.0213471				-0.0505413		-0.0153168			-0.0190232		-0.0303826								-0.08167						-0.09691	-0.0338583
	0.115296						0	0.0229177				-0.0498175		-0.0148491			-0.0159392		-0.0211893								-0.08167						-0.09691	-0.0295203
	0.115296						0.00213413	0.0229177				-0.0498175		-0.0141887			-0.0115477		-0.0203613								-0.0813366						-0.09691	-0.0280287
	0.119773						0.00309108	0.0238648				-0.0497309		-0.0130953			-0.0100836		-0.020276								-0.081						-0.095933	-0.0280287
	0.13509						0.00454763	0.0249424				-0.049218		-0.0130953			-0.00960564		-0.0196943								-0.081						-0.0953835	-0.0128214
	0.13509						0.0046284	0.0299632				-0.0491691		-0.0123651			-0.00889371		-0.0179734								-0.0801751						-0.0953835	-0.00467826
	0.141492						0.0046284	0.0406179				-0.0485237		-0.0119888			-0.00766422		-0.01524								-0.0786852						-0.0953084	0.00604035
	0.141492						0.00616031	0.0832978				-0.0475182		-0.011089			-0.00637742		-0.00860017								-0.078452						-0.0949404	0.020598
	0.141492						0.00860017	0.0894004				-0.0471384		-0.0108851			-0.00637742		-0.00590886								-0.0779422						-0.0949404
	0.145709						0.00962465	0.0943394				-0.0464377		-0.0108308			-0.0054629		-0.00429998								-0.0779422						-0.0949404
	0.147802						0.0103101	0.130768				-0.04528		-0.00868618			-0.00467826		-0.00130615								-0.0774647						-0.0945039
	0.149885						0.0103101					-0.0450449		-0.00243986			-0.00311324		0								-0.0772004						-0.0938623
	0.151958						0.0105673					-0.0450449		0			-0.00272286		0.00755314								-0.076447						-0.0930496
	0.160152						0.0115819					-0.0450449		0.00107366			0.00135505		0.00860017								-0.0763385						-0.0930496
							0.0119978					-0.0448123		0.00122164			0.00135505		0.0108129								-0.0757207						-0.0929797
							0.0119978					-0.0440885		0.00604035			0.00539503		0.0144297								-0.0757207						-0.0929797
							0.0122345					-0.0439196		0.00637118			0.00539503		0.0144297								-0.0749024						-0.0923465
							0.0126502					-0.0437233		0.0105673			0.00539503		0.0188398								-0.0747957						-0.0921111
							0.0126502					-0.0434657		0.0116667			0.00768683		0.031574								-0.0738447						-0.0921111
							0.0137398					-0.0432252		0.0147949			0.0115819		0.0329481								-0.0726801						-0.0921111
							0.0147233					-0.0431333		0.0170333			0.0159881		0.0365642								-0.0719768						-0.0910278
							0.0147233					-0.0423725		0.0170333			0.0172943		0.0526368								-0.0719676						-0.0910278
							0.0147233					-0.0423243		0.0179007			0.0237667		0.0635718								-0.0717265						-0.0910278
							0.0147233					-0.0416409		0.0202034			0.0314085		0.065416								-0.0717265						-0.0897314
							0.01524					-0.0406179		0.0282568			0.0314085		0.0662932								-0.0713116						-0.0897314
							0.0155335					-0.0403243		0.0339191			0.0326502		0.0839019								-0.0710295						-0.0891855
							0.0208263					-0.0402774		0.0341001			0.0342141		0.10307								-0.0705811						-0.0890847
							0.0208263					-0.0396833		0.0417243			0.0389181		0.10307								-0.0701999						-0.0878304
							0.0208836					-0.0389181		0.045865			0.0401571		0.109144								-0.0701999						-0.087702
							0.0208836					-0.0389181		0.0569262			0.0501666		0.117042								-0.0698518						-0.0872854
							0.0225196					-0.0389181					0.0560296										-0.0693265						-0.0871502
							0.0225196					-0.038345					0.0734892										-0.0691259						-0.0871502
							0.0229177					-0.0379831					0.0746336										-0.0686788						-0.0871502
							0.0229177					-0.0372249					0.104444										-0.0685623						-0.0861861
							0.0229177					-0.0372249					0.117042										-0.0683969						-0.0858006
							0.0236731					-0.0372249					0.117508										-0.0671629						-0.0858006
							0.0237216					-0.0366448					0.130768										-0.0669468						-0.0850108
							0.0241337					-0.0365436					0.139368										-0.0669468						-0.0846937
							0.0249424					-0.0362122					0.158147										-0.065141						-0.0846756
							0.0263679					-0.0348655															-0.064147						-0.0843209
							0.0269577					-0.0346725															-0.0640611						-0.0839371
							0.0269577					-0.0337687															-0.0635559						-0.0835461
							0.0269577					-0.0324858															-0.0626959						-0.0835461
							0.0282568					-0.0323501															-0.0626959						-0.0831702
							0.0305306					-0.0321847															-0.0623133						-0.0831115
							0.0305306					-0.0315301															-0.0623133						-0.0828462
							0.0305306					-0.0311935															-0.0615518						-0.0828462
							0.0309605					-0.0305175															-0.0611945						-0.0826696
							0.0309605					-0.03004															-0.0611518						-0.0826696
							0.0313314					-0.0296838															-0.0611518						-0.0826696
							0.031663					-0.0288896															-0.0600462						-0.0826349
							0.0327925					-0.0288567															-0.0597682						-0.0826349
							0.0327925					-0.0288567															-0.059662						-0.081881
							0.0327925					-0.0287808															-0.059662						-0.08167
							0.0329481					-0.0281942															-0.0586067						-0.08167
							0.0329481					-0.0277841															-0.0583466						-0.08167
							0.0329481					-0.0276234															-0.0581772						-0.08167
							0.0338583					-0.0259561															-0.0579919						-0.0815352
							0.0368962					-0.0255541															-0.0571239						-0.0813978
							0.0388569					-0.0254564															-0.0562229						-0.0803409
							0.0398486					-0.0251835															-0.0555173						-0.0803409
							0.0428004					-0.0250383															-0.0541096						-0.0803409
							0.0466124					-0.024318															-0.0537531						-0.0801751
							0.0493918					-0.0241948															-0.0529361						-0.0800172
							0.0497716					-0.0241337															-0.0527064						-0.0799645
							0.051587					-0.0239122															-0.0509587						-0.0798021
							0.0525291					-0.0222764															-0.0479236						-0.0798021
							0.0579919					-0.0220501															-0.0474843						-0.0794972
							0.0643321					-0.0219387															-0.0450449						-0.0789366
							0.0768015					-0.0217533															-0.0450379						-0.0789366
							0.0779095					-0.0209206															-0.0439055						-0.0789366
							0.0921777					-0.0199138															-0.0417153						-0.0786852
							0.0921777					-0.0197941															-0.0403243						-0.0786852
							0.0934217					-0.0196943															-0.0393234						-0.078452
							0.0974061					-0.0174614															-0.0393234						-0.0783994
							0.107412					-0.0164318															-0.0393097						-0.0780247
							0.11246					-0.0142046															-0.0362122						-0.0780247
							0.11776					-0.0141887															-0.0308504						-0.0776049
							0.11776					-0.0124093															-0.0265978						-0.0776049
							0.122216					-0.011089															-0.0255541						-0.0772004
							0.130768					-0.0109954															-0.0234811						-0.0772004
							0.148157					-0.0108851															-0.020276						-0.0770471
							0.149169					-0.0108851															-0.0174058						-0.076997
												-0.00922663															-0.0171889						-0.07684
												-0.00864296															-0.0135921						-0.0760902
												-0.00467826															-0.0108308						-0.0760121
												-0.00429998															-0.00779024						-0.0760121
												0															-0.00646604						-0.0760121
												0.00534194															-0.00387766						-0.0760121
												0.00637118															-0.00260057						-0.0760121
												0.00637118															-0.0024888						-0.0760121
												0.00847431															0.00627151						-0.075547
												0.00956869															0.00981498						-0.0745572
												0.019959															0.0269577						-0.0745572
												0.0208836															0.0302415						-0.0745572
												0.0211893																					-0.074246
												0.0229177																					-0.074246
												0.0269577																					-0.074246
												0.0270582																					-0.0741017
												0.0270871																					-0.0738447
												0.0360832																					-0.0731071
												0.0386034																					-0.0731071
												0.0413927																					-0.0731071
												0.0433301																					-0.0731071
												0.0434657																					-0.0731071
												0.0456024																					-0.0727763
												0.056195																					-0.0726613
												0.0617198																					-0.0725507
												0.065416																					-0.0724097
																																	-0.0719768
																																	-0.0711492
																																	-0.0706578
																																	-0.0702214
																																	-0.0702214
																																	-0.0691259
																																	-0.0688813
																																	-0.0688813
																																	-0.0687857
																																	-0.0685623
																																	-0.0685623
																																	-0.0683969
																																	-0.0683969
																																	-0.0682648
																																	-0.0676433
																																	-0.0669468
																																	-0.0669468
																																	-0.0669468
																																	-0.0669468
																																	-0.0666252
																																	-0.0660782
																																	-0.0660519
																																	-0.0659285
																																	-0.0659285
																																	-0.0659285
																																	-0.0659285
																																	-0.0655298
																																	-0.0655015
																																	-0.0655015
																																	-0.0655015
																																	-0.065141
																																	-0.0648021
																																	-0.0648021
																																	-0.0645843
																																	-0.0645069
																																	-0.0645069
																																	-0.0643808
																																	-0.0633427
																																	-0.0633427
																																	-0.06309
																																	-0.06309
																																	-0.0627557
																																	-0.0627097
																																	-0.0626254
																																	-0.0621479
																																	-0.0621479
																																	-0.0619834
																																	-0.0616776
																																	-0.0616776
																																	-0.0611945
																																	-0.0611945
																																	-0.0610742
																																	-0.0609348
																																	-0.0602699
																																	-0.0597682
																																	-0.0597682
																																	-0.0597682
																																	-0.0597682
																																	-0.0597682
																																	-0.0597682
																																	-0.0591215
																																	-0.0591215
																																	-0.0591215
																																	-0.0588667
																																	-0.0588667
																																	-0.0585512
																																	-0.0583466
																																	-0.0583466
																																	-0.0583466
																																	-0.0583466
																																	-0.0577163
																																	-0.0577163
																																	-0.057468
																																	-0.0573157
																																	-0.0573157
																																	-0.0573157
																																	-0.0570614
																																	-0.0569297
																																	-0.0562229
																																	-0.0562229
																																	-0.0555173
																																	-0.0555173
																																	-0.0549314
																																	-0.054684
																																	-0.0544611
																																	-0.0544611
																																	-0.0541096
																																	-0.0537264
																																	-0.0537264
																																	-0.0532455
																																	-0.0527064
																																	-0.0527064
																																	-0.0527064
																																	-0.0527064
																																	-0.0526222
																																	-0.0526222
																																	-0.0519429
																																	-0.0519178
																																	-0.051609
																																	-0.051609
																																	-0.0511525
																																	-0.0505413
																																	-0.0505413
																																	-0.0502411
																																	-0.0500789
																																	-0.0500789
																																	-0.0491691
																																	-0.0489865
																																	-0.0488742
																																	-0.0485237
																																	-0.0475182
																																	-0.0475182
																																	-0.0474843
																																	-0.0474246
																																	-0.0474246
																																	-0.0471384
																																	-0.0471384
																																	-0.0466357
																																	-0.0464377
																																	-0.0464377
																																	-0.0464377
																																	-0.0464377
																																	-0.0461632
																																	-0.0461632
																																	-0.0457575
																																	-0.044881
																																	-0.044881
																																	-0.0446865
																																	-0.0446865
																																	-0.044381
																																	-0.044381
																																	-0.044381
																																	-0.0439055
																																	-0.0430088
																																	-0.0430088
																																	-0.0423725
																																	-0.0423725
																																	-0.0417153
																																	-0.0416409
																																	-0.0396833
																																	-0.0396833
																																	-0.0395706
																																	-0.0394506
																																	-0.0389181
																																	-0.0389181
																																	-0.0381796
																																	-0.0381796
																																	-0.0379831
																																	-0.037563
																																	-0.037563
																																	-0.0367944
																																	-0.0362122
																																	-0.0353059
																																	-0.0348655
																																	-0.0338583
																																	-0.033523
																																	-0.033523
																																	-0.0335098
																																	-0.0327925
																																	-0.0327925
																																	-0.0327925
																																	-0.0323501
																																	-0.0321847
																																	-0.0321847
																																	-0.0321847
																																	-0.0320362
																																	-0.0317144
																																	-0.0310927
																																	-0.0310927
																																	-0.0310342
																																	-0.0308504
																																	-0.0304004
																																	-0.0302616
																																	-0.0295203
																																	-0.0282896
																																	-0.0281942
																																	-0.0281942
																																	-0.0277841
																																	-0.0272023
																																	-0.0272023
																																	-0.0268721
																																	-0.0265978
																																	-0.0260329
																																	-0.0258073
																																	-0.0255541
																																	-0.0255541
																																	-0.0255541
																																	-0.0255541
																																	-0.024318
																																	-0.0241948
																																	-0.0239122
																																	-0.0235971
																																	-0.0231826
																																	-0.02293
																																	-0.02293
																																	-0.0222764
																																	-0.0213981
																																	-0.0213981
																																	-0.0213117
																																	-0.0210314
																																	-0.0206468
																																	-0.0197441
																																	-0.0197441
																																	-0.0196943
																																	-0.0196943
																																	-0.0193769
																																	-0.0193769
																																	-0.0192103
																																	-0.0190232
																																	-0.0187494
																																	-0.0186421
																																	-0.0177288
																																	-0.0177288
																																	-0.0177288
																																	-0.0177288
																																	-0.0175496
																																	-0.0175496
																																	-0.0160868
																																	-0.0153168
																																	-0.0144511
																																	-0.013726
																																	-0.013726
																																	-0.013726
																																	-0.0135921
																																	-0.0125891
																																	-0.0125891
																																	-0.0117384
																																	-0.0111979
																																	-0.0111523
																																	-0.00984279
																																	-0.00877392
																																	-0.00864911
																																	-0.00864911
																																	-0.00860017
																																	-0.00860017
																																	-0.00779024
																																	-0.00779024
																																	-0.0063634
																																	-0.00630947
																																	-0.00630947
																																	-0.00582954
																																	-0.00582954
																																	-0.00489351
																																	-0.00429998
																																	-0.00366495
																																	-0.00209299
																																	-0.00158213
																																	0
																																	0
																																	0
																																	0.00122164
																																	0.00123907
																																	0.00123907
																																	0.00242623
																																	0.00243986
																																	0.00370666
																																	0.0047121
																																	0.0047121
																																	0.00493522
																																	0.00534194
																																	0.00738195
																																	0.009208
																																	0.00962465
																																	0.00981498
																																	0.0123504
																																	0.0131796
																																	0.0133055
																																	0.0137547
																																	0.0139856
																																	0.0147233
																																	0.0182248
																																	0.0189311
																																	0.0236731
																																	0.0240465
																																	0.0240984
																																	0.0241337
																																	0.0263289
																																	0.0272634
																																	0.0311198
																																	0.0391307
																																	0.0469297

## Sheet: Table H. Bos measurements
File S2. Table H. LSI data for cattle (Bos taurus/primigenius) used in this project.
Author/Reference for published data	Arbuckle and Özkaya 2006	Gourichon and Helmer 2008	Atici	Russell et al	Russell et al	Russell et al	Marcinia	Orton and Frame	Arbuckle	Perkins and Daly 1968	Arbuckle	Carruthers	De Cupere	De Cupere	De Cupere	De Cupere	Çakırkar	Çakırkar	Çakırkar	Galik	Buitenhuis and Caneva 1998	Kansa	Kansa	Kansa	Boessneck and von den Driesch 1979	Galik	Gourichon and Helmer	Gourichon and Helmer	Gourichon and Helmer	Buitenhuis	Buitenhuis	Buitenhuis	Buitenhuis	Peters and Pöllath	Uerpmann 2001
Site	Körtik Tepe	Mureybet PPNA	Karain	Çatalhöyük Early	Çatalhöyük Middle	Çatalhöyük Late	Çatalhöyük TP	Çatalhöyük West	Köşk II-V	Suberde	Erbaba	Pinarbaşı	Bademağacı ENI	Bademağacı ENII	Bademağacı LN/EC	Höyücek	Ulucak VI	Ulucak V	Ulucak IV	Çukurici	Yumuktepe	Domuztepe I	Domuztepe II	Domuztepe III	Fikirtepe	Barcın	Menteşe Early	Menteşe Middle	Menteşe Late	Ilipinar X	Ilipinar IX	Ilipinar VIII	Ilipinar VI-IV	Pendik	Orman Fidanlığı
	-0.0925305	-0.0510217	0.0890418	-0.0224394	-0.0672631	-0.0986862	-0.10057	-0.124506	-0.0893861	0.0171194	-0.125838	0.0131614	-0.0634863	-0.10819	-0.108831	-0.119406	0.0456102	-0.0514172	-0.0869394	-0.0568024	-0.056739	-0.13939	-0.0861861	-0.0484398	-0.113943	-0.164471	-0.0819181	-0.130959	-0.133713	-0.123178	-0.178997	-0.11205	-0.176741	-0.113943	-0.120822
	-0.0243593	-0.0463393	0.0467474	0.0262526	0.072996	-0.0961866	0.0704562	-0.0647361	-0.0315171	0.0256436	-0.115945	-0.0549052	-0.0584886	-0.0881611	-0.0952845	-0.117557	-0.000625077	-0.0401917	-0.052365	-0.0195875	-0.0712366	-0.130534	-0.0222764	-0.105684	-0.11115	-0.191534	-0.01029	-0.0823157	-0.115485	-0.110116	-0.145629	-0.120919	-0.175243	-0.113943	-0.108067
	-0.0184834	-0.0382645		0.050006	-0.0132283	-0.0863299	-0.0590653	-0.0482158	-0.055771		-0.0857212		-0.0679743	-0.0678465	0	-0.108492	-0.0844467	-0.0221473	-0.00742402	-0.0287862	-0.0696587	-0.10755	-0.0552244	-0.08302	-0.102837	-0.17338	-0.0441434	-0.0971581	-0.0619489	-0.0484398	-0.083295	-0.0642267	-0.161268	-0.11115	-0.100115
	-0.00784891	-0.0325874		0.0829125	0.00440329	-0.0760965	-0.0557097	-0.0441821	-0.0287348		-0.0814841		-0.0634969	-0.0649376	-0.0525016	-0.108174	0.00228491	-0.0652402	-0.0529697	-0.0993089		-0.10691	-0.00376852	-0.0604807	-0.102196	-0.0675517	-0.0214003	-0.0869389	-0.134947	-0.105957	-0.0784828	-0.12616	-0.146328	-0.0803566	-0.09691
	0.0118992	-0.0292164		-0.00421431	0.0311802	-0.0655178	0.0110407	-0.0435134	-0.0282212		-0.0568949		-0.051959	-0.0303985	-0.038086	-0.103563	-0.0584119	-0.08088	-0.0873783	-0.0036419	-0.0668404	-0.104363	-0.0993706	0.0149403	-0.101799	-0.151545	-0.0910587	-0.0819181	-0.104457	-0.0785977	-0.077288	-0.110461	-0.145629	-0.0801583	-0.09691
	0.017259	-0.0280985		0.0140053	0.0885561	-0.0568949		-0.070261	0.0128914		-0.00492095		0.0221321	-0.180456	-0.00913929	-0.0995342	-0.0491005	-0.141506	-0.0773114	-0.160405		-0.0766919	-0.0340488	-0.0846027	-0.100213	-0.08088	-0.0835207	-0.0681611	-0.0730244	-0.0731537	-0.0672631	-0.0891643	-0.144931	-0.0744861	-0.0921462
	0.0329361	-0.0280985		0.0173538	0.0909036	-0.0473248	-0.0398784	-0.108302	-0.104334		-0.00190151		-0.0548487	-0.0809219	-0.0708572	-0.09691		-0.0740037	-0.049105	-0.023372		-0.0760965	-0.0501615	-0.0546785	-0.0997029	0.00880367	-0.113169	-0.0633515	-0.123325	-0.0520215	-0.107349	-0.110813	-0.117906	-0.0685764	-0.0903791
	0.0476416	-0.0269835		0.0263964	-0.0024606	-0.0428932	-0.102027	-0.111881	-0.089008		-0.0705811		-0.0913789	-0.0675262	-0.0691996	-0.0937284		-0.062396	-0.0471113			-0.0672631	-0.0416746	-0.0375612	-0.0997029		-0.0637928	-0.0633515	-0.0774971	-0.0669116	-0.104577	-0.0428004	-0.114643	-0.0674428	-0.0754211
	0.0579919	-0.0269835		0.0159891	0.0353075	-0.0423424	-0.0922396	-0.0779429	-0.0531815		0.0827854		-0.0718864	-0.0362122	-0.146668	-0.0930033		-0.0538894	-0.040531	-0.07375		-0.0632016	-0.0706848	-0.00279911	-0.0983797	-0.119206	0.0273036	-0.0614426	-0.0712392	-0.154315	-0.0614803	-0.114999	-0.1012	-0.0674428	-0.0669468
	0.0702875	-0.0269835		0.0191649	0.0487812	-0.0406942	-0.0128568	-0.126136	-0.0336594		-0.0719301		-0.0668461	0.0445398	-0.0328784	-0.0907497		-0.0922421	-0.0838776	-0.144186		-0.136677	-0.0706848	-0.09691	-0.0934217	-0.0955695		-0.0614426	-0.0991448	-0.120456	-0.0545314	-0.0500203	-0.0814841	-0.066458	-0.0538754
		-0.0242084		0.0293289	0.0734313	-0.0379611	-0.156058	-0.0838466	-0.0200866		-0.0696652		-0.0640351	-0.115485	-0.0214374	-0.0897743		-0.0669116	-0.0662309	-0.108973		-0.118045	-0.0491005	-0.0122875	-0.093117	-0.0449595		-0.0400719	-0.0567692	-0.0950224	-0.0496351	-0.150974	-0.0580347	-0.065353	-0.0373243
		-0.021451		0.002314	0.111121	-0.035245	-0.0613977	-0.0595919	-0.0029544		-0.0333853		-0.0570862	-0.0736366	-0.0583838	-0.0886944		-0.0650701	-0.0626268	-0.0168767		-0.114074	-0.0235464	0.0324808	-0.0930033	-0.128114		-0.0249257	-0.0690558	-0.0903775	-0.0447935	-0.137862	-0.055758	-0.0639823	-0.00954532
		-0.018165		0.00492866		-0.0347039	-0.0550015	-0.0129551	-0.0929988		9.61999e-05		-0.0844781	-0.0579645	-0.0482489	-0.0876144		-0.0788995	-0.0620181	-0.0773915		-0.102373	-0.00294838	-0.0138175	-0.0927541	-0.0854444		-0.00691686	-0.067571		-0.0362122	-0.120456	-0.0208649	-0.0627908	0
		-0.018165		0.0177709	-0.0170155	-0.0250762	-0.0518383	0.0828746	-0.0522873		0.0513022		-0.113356	-0.055771	-0.0324173	-0.0871502		-0.0746953	-0.105017	-0.0626265		-0.0835461	0.0234502	-0.0830353	-0.0927541	-0.0814782		-0.120532	-0.0573174		0.00302947	-0.117365	-0.128427	-0.0579919	0
		-0.0176198		0.0503153	0.0386503	-0.0151401	-0.122712	0.0514968	-0.0468671		-0.0587638		-0.10544	-0.0365135	-0.00315651	-0.0867591		-0.105216	-0.0693039	-0.152373		-0.0783135	-0.0782286	-0.0207434	-0.0910805	-0.0752067		-0.098151	-0.0333794		-0.126932	-0.0706848	-0.123782	-0.0579919
		-0.0149037		0.0514797	0.0583339	-0.0100005	-0.0899795	-0.0963227	-0.0455225		-0.0487668		-0.0976659	0.0166113	0.00295181	-0.0865937		-0.100747	-0.0451702	-0.0897649		-0.05061	-0.0678702	-0.135451	-0.0887266	-0.0690245		-0.0928947			-0.104945	-0.0517406	-0.120331	-0.0552228
		-0.00792048		0.0520607	0.0635041	0.00456947	-0.0473865	-0.0706848	-0.0226424		-0.0438533		-0.0976659	-0.144854	0.0113616	-0.0831702		-0.0977924	-0.0722793	-0.0824611		-0.000869459	-0.0635054	-0.0618733	-0.0859146	-0.0682579		-0.0883471			-0.0934602		-0.10902	-0.0532455
		-0.00738793		-0.0355039	-0.0240848	0.00555651	-0.0391662	-0.0731354	-0.0113287		-0.022664		-0.0838776	-0.122074	0.00463748	-0.0815675		-0.0570694	-0.0664104	-0.0758327		-0.0964533	0.0168806	-0.0372064	-0.0859146	-0.062929		-0.0832074			-0.0904876		-0.10513	-0.0532455
		-0.00526424		-0.0355039	0.0256868	0.00752387	0.00875739	-0.0825839	-0.00885411		-0.0175243		-0.0878838	-0.0581947	0.0133361	-0.079651		-0.0881361	-0.057753	-0.0705465		-0.0940571		-0.00240335	-0.0859146	-0.0458666		-0.0806602			-0.0607219		-0.103474	-0.0515578
		-0.00367826		0.0429775	-0.0455804	0.0143403	-0.120532	-0.0337353	0.010451		-0.155729		-0.0859301	-0.052738	-0.167098	-0.0789366		-0.0220145	-0.0783804	-0.0679274		-0.0828527		-0.0978234	-0.0859146	-0.0329658		-0.0756102			-0.0579645		-0.100727	-0.0485504
		0		0.0623841	-0.0285231	0.0220017	-0.0638467	-0.0919203	0.0294996		-0.073952		-0.0740037	-0.0512617	-0.0845064	-0.0789366		-0.0409395	-0.0361827	0.00188938		-0.0782202		-0.0341543	-0.0859146	-0.14826		-0.0731071			-0.0535887		-0.093665	-0.0485504
		0.00156691		0.000422534	0.0014799	0.0313922	-0.04766	-0.0693349	0.0536638		-0.068295		-0.0681611	-0.0696754	-0.09691	-0.0727763		0.0204748	-0.0826522	-0.0557576		-0.0753498		-0.167424	-0.0859146	-0.0804074		-0.0632363			-0.050876		-0.0909791	-0.0471791
		0.00312819		-0.0348601	0.0162775	0.0323202	-0.0264146	-0.046472	0.0810911		-0.00960111		-0.0614426	-0.0696754	-0.0640541	-0.0681383		-0.058177		-0.0540545		-0.0719301		-0.122902	-0.0859146	-0.0599574		-0.0620181			-0.0465707		-0.0883098	-0.0463
		0.00777862		-0.0471405	0.053437	0.0751011	-0.0148033	-0.0395674	-0.166123		0.00098121		-0.0604912	-0.0647361	-0.0574151	-0.0679463		-0.0388718		-0.0520759		-0.0691008		-0.107585	-0.0859146	-0.0327154		-0.0614103			-0.138732		-0.0861861	-0.0463
		0.0219362		0.0805126	-0.0510905	-0.00966115		0.00344142	-0.065393		-0.102844		-0.0604912	-0.053653	-0.157363	-0.0673548				-0.0409395		-0.0465707		-0.0327251	-0.0857121	-0.0197096		-0.051799			-0.127399		-0.076756	-0.0439055
		0.0219362		-0.00406818	-0.0128372	-0.00392635	-0.0674926	0.00104701	-0.0334059		-0.0811805		-0.0585947	-0.0502468	-0.0548487	-0.0673548				-0.0354766		-0.0428382		-0.101741	-0.0855446	-0.166613		-0.049429			-0.0908188		-0.0757207	-0.0347621
		0.023426		0.0287473	0.00222652	0.0115704	-0.0987811	0.0364711	-0.0139332		-0.0435134		-0.0520215	-0.0441821	-0.00742402	-0.0666685						-0.0333853		-0.0495628	-0.0817818	-0.105017		-0.0389214			-0.0753703		-0.0644927	-0.0263289
		0.0303119		0.0732152	0.0143924	-0.0568664	-0.0570694		-0.0108726		0.0186345		-0.0877013	-0.0435134	-0.0632155	-0.0646722						-0.0231178		-0.120524	-0.0803566	-0.104121		-0.0783312			-0.0713033		-0.0447935	-0.0244738
		0.0303119		-0.00390227	0.0207442	-0.0433695	-0.0491005		-0.00241598		0.0294996		-0.0693792	-0.0349132	-0.0863115	-0.0629536						-0.0111089		-0.0950949	-0.0791812	-0.0697033		-0.0898149			-0.0632818		-0.0310503	-0.0170333
		0.0447097		0.0531554	0.0246674	-0.0261726	-0.043868		0.0353726		-0.079449		-0.0547797	-0.154083	-0.0855748	-0.0627243						0.0207584		-0.099475	-0.0778868	-0.192866		-0.059934			-0.0422277		-0.0150229	-0.0131614
				0.0639325	0.031641	-0.0180737	-0.0235464		-0.0518378		-0.064702		-0.0541819	-0.0910309	-0.00700736	-0.0612336						-0.142123		-0.0915905	-0.0772337	-0.117365		-0.043351			-0.0175243		-0.0145735	-0.00954532
				0.0532723	0.0712832	-0.00376852	0.0430457		-0.106869		-0.0314828		-0.0512053	-0.08088	0.00450985	-0.0604062						-0.112523			-0.0763883	-0.0977924		0.0248456			-0.0973468		-0.120535	0.0182248
				0.0577381	-0.032623	0.0391654	-0.163725		-0.0791533		0.0435209		-0.0506124	-0.068168	-0.0925006	-0.0593729						-0.0914241		-0.0728781	-0.0763883	-0.0762527		-0.122796			-0.0957111		-0.118635	0.0287717
					-0.0164432	0.0555558	-0.0853699		-0.0784826		-0.0425682		-0.0894472	-0.0667783	-0.0837561	-0.0575437						-0.0908188		-0.0697925	-0.0758533	-0.0762527		-0.108451			-0.0807339		-0.118003	0.0362122
					-0.00669548	-0.0395319	-0.0826212		-0.07581		-0.096966		-0.0124358	-0.0605789	-0.011483	-0.0570385						-0.0800655		-0.0446919	-0.0758533	-0.0706848		-0.0723647			-0.0724019		-0.116742	0.0532455
					0.0182768	-0.0434714	-0.050926		-0.0512085		-0.0731537		-0.0839933	-0.0558176	-0.0872838	-0.0551607						-0.0471228		-0.0271917	-0.0739801	-0.0451702		-0.0769057			-0.0241243		-0.109254
					0.0297522	-0.0315722	-0.0483863		-0.00924397		-0.0309193		-0.0812533	-0.0544667	-0.0872838	-0.0551607								-0.0190357	-0.0739801	0.0234502		-0.0739712			-0.183925		-0.106172
					-0.024456	-0.00604494	-0.110022		-0.00639612		-0.0889636		-0.0664845	-0.0457872	-0.0659317	-0.0551607								-0.13665	-0.0739801	0.0376906		-0.0624279			-0.135811		-0.103112
					0.0299417	0.0117369	-0.0363835		0.00646866		-0.0849237		0.00738418	-0.0201198	-0.0505795	-0.0545588								-0.119617	-0.0733517	-0.194274		-0.058177			-0.126956		-0.103112
					0.0335359	0.0234754	-0.0354766		0.0162775		-0.079926		-0.0900334	-0.0962672	-0.127575	-0.054437						-0.0978934		-0.114084	-0.0725507	-0.162229		-0.058177			-0.113616		-0.103112
					0.0394609	0.0312638	-0.0327707		-0.0759688		-0.0595419		-0.0825839	-0.0872838	-0.0920185	-0.0537531						-0.0978934		-0.111344	-0.0725507	-0.0620601		-0.055366			-0.103685		-0.102502
					0.0476224	0.0328858	-0.0314241		-0.0720474		-0.0538894		-0.0595695	-0.0811717	-0.0879501	-0.0530903						-0.0919181		-0.0339878	-0.0716932	-0.059184		-0.040284			-0.095455		-0.101286
					0.0533595	0.0545952	-0.0168802		-0.0483095		-0.0492346		-0.0540016	-0.0771442	-0.0789333	-0.051472						-0.0876234		-0.0264346	-0.0716932	-0.0563268		-0.0347515			-0.0910309		-0.0952535
					0.071225	-0.0753898	-0.0168802		-0.0428004		-0.0473865		0.00416323	-0.0751444	-0.0789333	-0.0511525						-0.0854919		-0.0597586	-0.0713559	-0.0492649					-0.0866514		-0.0851876
					0.0734074	-0.0640351	-0.0129967		-0.0382623		-0.0382623		-0.0620601	-0.0751444	-0.0691294	-0.0509216						-0.0833708		-0.0412752	-0.0698912	-0.0492649					-0.0766012		-0.0674121
					0.0739513	-0.0584671	-0.00787224		-0.00607764		-0.0373604		-0.0520759	-0.0724922	-0.0604912	-0.0494854						-0.0791594		-0.0173861	-0.0690809	-0.0478662					-0.0751842		-0.0623848
					0.00740491	-0.0543375	0.00714808		-0.000248097		-0.0373604		-0.0478662	-0.0705136	-0.102803	-0.0480893						-0.0760275		0.000587281	-0.0685764	-0.0423161					-0.0744775		-0.0574151
					0.0470941	-0.0258381	0.0240394		0.00794638		-0.0364603		-0.0402227	-0.0639828	-0.0896415	-0.0451765						-0.0532313		0.00409439	-0.0681158	-0.0409395					-0.068168		-0.0465707
					-0.0611094	-0.0182076	0.0646784		0.00875739		-0.0328784			-0.0626883	-0.0870564	-0.0429824						-0.0131866		-0.0314241	-0.0678197	-0.0395674					-0.065393		-0.0365135
					0.00409439	-0.00455717	0.0700335		0.0119864		-0.0310985			-0.0309193	-0.0844866	-0.0426554						-0.00427772		-0.0091477	-0.0674428	-0.0287433					-0.0592132		-0.0359905
					-0.0421012	0.0255282	-0.147054		0.0183732		-0.0275605			-0.1156	-0.0768672	-0.0409586						-0.128073		0.0437046	-0.0674428	0.000952623					-0.0471113		-0.0323475
					-0.00733908	0.030064	-0.0295318		0.0215317		-0.0197037			-0.0938919	-0.0737315	-0.0405563						-0.124033			-0.0661607	0.0228545					-0.0438087		-0.0287348
					-0.00618863	0.0328749	-0.0780726		0.0285555		-0.00607764			-0.0917366	-0.0577434	-0.0405563						-0.0967589			-0.0660198	0.0299163					-0.0282965		-0.127399
					0.00403054	-0.0471113	-0.040284		0.0293289		-0.00440406			-0.088737	-0.0785304	-0.0393097						-0.0967589			-0.0660198						-0.0232465		-0.124775
					0.0374959	-0.0464488	-0.0347515		0.0489699		-0.000248097			-0.0425954	-0.0785304	-0.0374454						-0.0870494			-0.0647721						-0.21597		-0.122817
					0.0507968	-0.0176346			0.0705811		0.00222652			-0.119435	-0.0758246	-0.0370108						-0.0855748			-0.0640379						-0.177512		-0.120868
					-0.0350574	-0.0030146			-0.0712392		0.0199553			-0.117263	-0.0744779	-0.0351644						-0.0797256			-0.0628993						-0.129479		-0.118928
					0.0412455	-0.109515			-0.0675272		0.0347049			-0.112952	-0.0717971	-0.0347621						-0.0768303			-0.0621479						-0.0733028		-0.116355
					0.0434613	-0.0240848			-0.0675272		0.0497079			-0.104457	-0.0691327	-0.0338583						-0.0746714			-0.0617456								-0.115073
					0.0511288	-0.0698561			-0.0614103		-0.100803			-0.101314	-0.0359057	-0.0332067						-0.0746714			-0.0617456						-0.173544		-0.104334
					0.0935074	-0.0601109			-0.04766		-0.0793922			-0.0971581	-0.0359057	-0.0314531						-0.0718095			-0.0616569						-0.109875		-0.101845
					-0.0117099	-0.0499515			-0.0412345		-0.0749831			-0.0971581	-0.0781748	-0.031158						-0.0703856			-0.0616569						-0.0982807		-0.101225
					0.00714808	-0.030319			-0.0377694		-0.0662969			-0.0950949	-0.07526	-0.0161656						-0.0529697			-0.0606978						-0.0937284		-0.0987542
					0.0414367	-0.0261402			-0.0225096		-0.0595919			-0.0909978	-0.0709243	-0.012712						-0.0349132			-0.0599979						-0.110461		-0.0938537
					0.0526594	-0.0214131			-0.0186393		-0.0506124			-0.0889636	-0.0652098	-0.011281						-0.0277669			-0.059672						-0.106154		-0.0932451
					0.0537659	-0.0173187			-0.0131696		-0.049429			-0.0879501	-0.0623805	-0.0102852						-0.013194			-0.0595857						-0.0955695		-0.0854089
					-0.0539673	-0.0109617			-0.0131696		-0.0464846			-0.0869389	-0.0595695	-0.00779024						-0.00455717			-0.0595857						-0.0893405		-0.0363189
					-0.0375252	0.0211001			-0.0120838		-0.0441434			-0.0839195	-0.0581708	-0.00531434						0.00331179			-0.0595857						-0.0872838		-0.254989
					-0.0308538	-0.0819181			-0.011542		-0.0389214			-0.0839195	-0.0553869	-0.0045161						-0.0999246			-0.0587401						-0.0744798		-0.14159
					-0.0127016	-0.0691294			-0.00830498		-0.0360471			-0.0829177	-0.049872	-0.000434512						-0.0932373			-0.0587401						-0.0601109		-0.13618
					-0.0114336	-0.0595419			-0.00190249		-0.032623			-0.0819181	-0.14793	0						-0.0910309			-0.0572954						-0.0474483		-0.134391
					-0.00765159	-0.0548264			0.00597014		-0.0241789			-0.0809209	-0.0478662	0.00129447						-0.0910309			-0.0569049								-0.12907
					0.0476649	-0.0520215			0.00700912		-0.0214003			-0.0809209	-0.0478662	0.0140485						-0.0866514			-0.0557552						-0.0391531		-0.127896
					0.0542452	-0.0492346			-0.0509889		-0.011542			-0.0769547	-0.0450823	0.0199711						-0.0660851			-0.0543577						-0.117263		-0.124975
					0.0639325	-0.041889			-0.0451397		0.00178917			-0.0769547	-0.0327707	0.0334238						-0.0640121			-0.0543577						-0.110813		-0.121496
					0.0806382	-0.0346657			-0.0429665		0.0101112			-0.0749851	-0.0327707	0.0469966						-0.0257642			-0.0543577						-0.101314		-0.118045
					-0.0146106	-0.0258022			-0.0163401		0.0137026			-0.0749851	-0.0783804							-0.192489			-0.0532455						-0.0961253		-0.1169
					-0.0133005	-0.0223069			0.0657764		0.0177709			-0.0740037	-0.058177							-0.109515			-0.0532455						-0.0961253		-0.111788
					0.012104	-0.0197037			-0.0970067		-0.130759			-0.0740037	-0.0443006							-0.106379			-0.0527908						-0.0819181		-0.105619
					0.0133361	-0.0136896			-0.0614396		-0.105838			-0.0730244	-0.0388718							-0.100175			-0.052029						-0.0740037		-0.0919181
					0.0349353	-0.0128372			-0.0518943		-0.0721046			-0.0720474	-0.0308538							-0.0721462			-0.052029						-0.0700999		-0.0749885
					0.0476247	-0.00607764			-0.0446919		-0.0517256			-0.0710725	-0.098276							-0.0675505			-0.0517629						-0.0691294		-0.0662561
					0.0588475	-0.00190571			-0.0150145		-0.0444141			-0.0671949	-0.0750461							-0.050737			-0.0517629						-0.0691294		-0.0537251
					0.0588475	-0.000248097			-0.00316934		-0.0436897			-0.0671949	-0.0690558							-0.125182			-0.0517629						-0.0671949		-0.0512617
					0.0632566	0.0135919			-0.00187294		0.010668			-0.065269	-0.0616822							-0.109405			-0.0507535						-0.062396		-0.0497903
					0.0654445	0.0167852			0.0195937		-0.075779			-0.065269	-0.0487172							-0.108467			-0.05061						-0.0614426		-0.0396281
					0.0687058	0.0215317			0.038872		-0.0644193			-0.065269								-0.108467			-0.05061						-0.0567065		-0.122201
						0.0238856			-0.00240216		-0.0369048			-0.0633515								-0.094635			-0.05061						-0.0446291		-0.121414
						0.0354675			0.00947792		-0.0285661			-0.0633515								-0.0073611			-0.0504095						-0.0437138		-0.112074
						0.0362287			-0.114296		-0.0110301			-0.062396								-0.134183			-0.0498464						-0.0364603		-0.109004
						0.0460054			-0.11277		0.00455166			-0.062396								-0.131903			-0.0496878						-0.0214374		-0.106716
						-0.0724836			-0.103721		0.00709512			-0.062396								-0.124389			-0.0496878						-0.139015		-0.0991765
						-0.0614103			-0.0804761		-0.14641			-0.0604912								-0.124389			-0.048177						-0.114313		-0.0947145
						-0.0571791			-0.0790637		-0.094381			-0.0576496								-0.119206			-0.0479236						-0.108181		-0.0917651
						-0.04766			-0.0693039		-0.0814417			-0.0492346								-0.113356			-0.0479236						-0.102803		-0.0917651
						-0.0441434			-0.0665552		-0.0797453			-0.0492346								-0.10974			-0.0479236						-0.101469		-0.0484394
						-0.0435601			-0.0651873		-0.0772129			-0.0483095								-0.104728			-0.0471791						-0.100139		-0.30196
						-0.0435601			-0.0624645		-0.021965			-0.0391662								-0.0990691			-0.0471791						-0.0961724		-0.297086
						-0.0418147			-0.0624645		-0.00954532			-0.035562								-0.0976659			-0.0471791						-0.0883471		-0.198628
						-0.0418147			-0.0611094		0.0283633			-0.0302113								-0.0920979			-0.0470816						-0.0877013		-0.146275
						-0.0412345			-0.0584119		-0.164494			-0.0249257								-0.0914069			-0.0470816						-0.0768672		-0.127506
						-0.0371945			-0.0504185		-0.136251			-0.024051								-0.090717			-0.0469966						-0.0706183		-0.123588
						-0.0197416			-0.0425696		-0.0977924			-0.0214374								-0.0646314			-0.0469966						-0.0693792		-0.123588
						-0.0197416			-0.0361355		-0.0624645			-0.017116								-0.0594689			-0.0469966						-0.068761		-0.120995
						-0.0164432			-0.0285383		-0.0597586			-0.00440406								-0.128978			-0.0469218						-0.0675272		-0.119704
						-0.00723132			-0.027285		-0.0584119			-0.114999								-0.126642			-0.0463						-0.0675272		-0.108258
						-0.00616031			-0.0223073		-0.0530667			-0.109536								-0.116055			-0.0463						-0.0656831		-0.0886255
						-0.00509193			-0.0161644		-0.043868			-0.108858								-0.112883			-0.0457575						-0.0601972		-0.132547
						0.00126371			-0.0137314		-0.0361355			-0.107505								-0.0546653			-0.0447097						-0.0541819		-0.129586
						0.00388469			-0.0113119		-0.0186112			-0.100139								-0.159306			-0.0447097						-0.0470719		-0.101035
						0.0101112			-0.00890587		-0.000588077			-0.0988125								-0.117263			-0.0447097						-0.178388
						-0.0644449			-0.00770782		0.00872691			-0.0896415								-0.114026			-0.0437789						-0.174458		-0.104016
						-0.0429665			-0.00413336		-0.0708046			-0.0883471								-0.112952			-0.0433514						-0.147899		-0.129635
						0.0100288			-0.00413336		-0.0549052			-0.0877013								-0.106566			-0.0411311						-0.120273		-0.128882
						0.010668			-0.00294838		-0.0450823			-0.0877013								-0.100271			-0.0408363						-0.10835		-0.119206
						0.0281923			-0.00176662		-0.0181824			-0.0877013								-0.094067			-0.0408363						-0.101682		-0.117003
						-0.0835207			0.00175947		-0.0053325			-0.0844866								-0.0930415			-0.0408363						-0.0894472		-0.114811
						-0.0592181			0.0029285		-0.00406818			-0.0825692								-0.0909978			-0.0401172						-0.0814782		-0.114811
						-0.0397203			0.00409439		-0.00155052			-0.0825692								-0.0859301			-0.0401172						-0.0713325		-0.112631
						-0.0390147			0.00525716		-0.00155052			-0.0812956								-0.0849237			-0.0382645						-0.0436897		-0.111906
						-0.0970157			0.0075734		-0.000297146			-0.0787596								-0.0829177			-0.0382645						-0.16455		-0.10974
						-0.0822925			0.0121692		0.00714808			-0.0781279								-0.0700999			-0.0382645						-0.14444		-0.103306
						-0.0655868			0.0133105		0.0156759			-0.0768672								-0.0681611			-0.0372481						-0.137616		-0.103306
						-0.00954532			0.0155843		0.0592565			-0.0756102								-0.0633515			-0.0372481						-0.12805		-0.101889
						-0.00954532			0.0189729		0.0678994			-0.0756102								-0.0633515			-0.0366289						-0.12805		-0.09279
						0.0203699			0.0300807		0.0721572			-0.0756102								-0.0633515			-0.0365168						-0.115001		-0.0900282
						-0.0804761			0.0430457					-0.0749831								-0.0604912			-0.0355762						-0.114084		-0.0778129
						-0.0748541			0.0525216					-0.0737315								-0.0492346			-0.0355762						-0.111344		-0.0588279
						-0.0624645			0.0597514					-0.0731071								-0.0446291			-0.0355383						-0.110435		-0.0588279
						-0.0570694			0.0738597					-0.0718609								-0.0328784			-0.0347621						-0.0908926
						-0.0517406			-0.0767336					-0.0706183								-0.0293259			-0.0336831						-0.200259		-0.1946
						-0.0335883			-0.0708046					-0.0706183								-0.0258022			-0.0331684						-0.200259		-0.14472
						-0.00770782			-0.057753					-0.0706183								-0.1629			-0.0331684						-0.194702		-0.139482
						-0.00532158			-0.0520759					-0.0681437								-0.113627			-0.0331684						-0.192866		-0.129343
						0.0075734			-0.0450823					-0.0675272								-0.112259			-0.0329361						-0.183799		-0.124911
						0.0110248			-0.043697					-0.0662969								-0.110896			-0.0329361						-0.183799		-0.117263
						0.0223352			-0.0423161					-0.0656831								-0.10683			-0.0325874						-0.174917		-0.112952
						0.0278818			-0.0395674					-0.064458								-0.099475			-0.0325874						-0.164494		-0.112952
						0.0344455			-0.0381995					-0.0632363								-0.0961724			-0.0325874						-0.142733		-0.0981934
						-0.0895258			-0.0381995					-0.0608033								-0.0955149			-0.0317566						-0.141103		-0.0930415
						-0.0534807			-0.0354766					-0.0589874								-0.0922421			-0.0308139						-0.141103		-0.0889636
						-0.0359057			-0.0327707					-0.0571791								-0.0896415			-0.0303119						-0.134645		-0.0889636
						-0.00389683			-0.0300816					-0.0571791								-0.0857696			-0.0303119						-0.133046		-0.0720474
						-0.000481652			-0.0287433					-0.0559778								-0.0844866			-0.0303119						-0.131452		-0.0538894
						0.0151101			-0.0247528					-0.0500203								-0.0825692			-0.0299632						-0.126705		-0.0529544
						-0.0900334			-0.0221127					-0.0447275								-0.0800258			-0.0297352						-0.125135		0.0548389
						-0.0207315			-0.0053325					-0.0423957								-0.0762383			-0.0297352						-0.125135		-0.16598
						-0.0169051			-0.00155052					-0.0331918								-0.0737315			-0.0288567						-0.120456		-0.126136
						-0.00810579			0.00344142					-0.0252953								-0.0608033			-0.0276323						-0.117365		-0.117757
						0.0196117			0.0046805					-0.0219546								-0.0577811			-0.0269835						-0.115828		-0.114999
						0.0311321			0.00837664					-0.0131696								-0.0571791			-0.0269835						-0.114296		-0.113627
						0.044565			0.00837664					-0.0838536								-0.049429			-0.0269835						-0.114296		-0.111577
						0.0597289			0.0204748					-0.0659661								-0.032623			-0.0263289						-0.11277		-0.106157
						-0.0873083			0.0216662					-0.062929											-0.0263289						-0.11277		-0.105484
						-0.0722793			0.0275751					-0.0591624								-0.151595			-0.0263289						-0.111248		-0.101469
						-0.0649554			0.0310822					-0.0509889								-0.142413			-0.0263289						-0.109733		-0.0806602
						-0.0549052			0.0334046					-0.01363								-0.125485			-0.0263289						-0.109733		-0.0774971
						-0.0520759			0.0357147					-0.0696836								-0.11855			-0.0263289						-0.109733		-0.0681437
						-0.0423161			0.0380126					-0.0599574								-0.111724			-0.0263289						-0.108222		0.00597014
						-0.0409395			0.0437046					-0.0404271								-0.111724			-0.0255541						-0.105216		-0.159083
						-0.0395674			0.0448341					-0.0320211								-0.110878			-0.0255541						-0.105216		-0.125485
						-0.0395674			0.0470843					-0.0197096								-0.105003			-0.0233011						-0.100747		-0.0967464
						-0.0300816			0.0537659					-0.124282								-0.0975651			-0.0229492						-0.100747		-0.166613
						-0.027409			0.0581639					-0.0908926								-0.0736529			-0.0229492						-0.100747		-0.129946
						-0.0260789								-0.0839989								-0.0591624			-0.0222764						-0.0963227		-0.127105
						-0.0207986								-0.0655868								-0.040804			-0.0222764						-0.0963227		-0.125221
						-0.0181824								-0.102238								-0.0273529			-0.021451						-0.094858		-0.119617
						-0.0181824								-0.0993806								-0.110925			-0.0195956						-0.0861718		-0.117765
						-0.0142873								-0.0826212								-0.10514			-0.0195956						-0.0833146		-0.104121
						-0.0129967								-0.0812533								-0.10514			-0.0195956						-0.0833146		-0.103226
						0.0046805								-0.0798897								-0.100242			-0.0194784						-0.0804761		-0.068052
						0.00714808								-0.0785304								-0.0970067			-0.0190232						-0.0790637		-0.0378142
						0.039157								-0.0678066								-0.0914028			-0.0190232						-0.077656		-0.152641
						0.0437046								-0.059934								-0.0906081			-0.0190232						-0.0748541		-0.146011
						0.0548696								-0.0586356								-0.0843025			-0.0182248						-0.0720701		-0.129864
						-0.0089086								-0.0586356								-0.0819613			-0.0159881						-0.0720701		-0.126705
						0.00104701								-0.0586356								-0.0796326			-0.0157943						-0.0693039		-0.126705
						0.00594052								-0.0297974								-0.0742471			-0.0148916						-0.0679274		-0.12357
						0.00957481								-0.0166541								-0.0696836			-0.012965						-0.0651873		-0.120456
						-0.0558721								-0.00618863								-0.0540785			-0.0125891						-0.0611094		-0.118908
						-0.0501388								0.0017803								-0.0313279			-0.0105931						-0.0611094		-0.117365
						-0.0347515								-0.111599								-0.0292549			-0.0105931						-0.0611094		-0.115828
						-0.0292886								-0.0976129								-0.22757			-0.00968727						-0.0570694		-0.115828
						-0.0292886								-0.0840636								-0.132807			-0.00968727						-0.0491005		-0.109733
						-0.0238936								-0.0666314								-0.125221			-0.00940747						-0.0491005		-0.106717
						-0.0225553								-0.0637928								-0.116842			-0.00901682						-0.0477864		-0.106717
						-0.0185648								-0.049872								-0.112256			-0.00706185						-0.0464764		-0.105216
						-0.0106922								-0.0485041								-0.110435			-0.00643411						-0.043868		-0.0977924
						-0.00423892								-0.0471405								-0.101443			-0.00490733						-0.043868		-0.0977924
						0.0108685								-0.0471405								-0.0970157			-0.00298485						-0.0425696		-0.0933982
						0.0349353								-0.0324173								-0.0746953			0						-0.0386977		-0.0904932
						0.0464864								-0.000702866								-0.0582739			0						-0.0361355		-0.0904932
						0.0665343								-0.0950224								-0.0494999			0						-0.0348601		-0.0904932
						0.0740874								-0.0606197								-0.0494999			0						-0.0323203		-0.0876075
														-0.0610063								-0.0424508			0.00634018						-0.031056		-0.0847409
														-0.0610063								-0.174917			0.00961577						-0.0235464		-0.0804761
														-0.0567692								-0.161074			0.0115819						-0.0210718		-0.0790637
														-0.055366								-0.157681			0.0115819						-0.0198397		-0.0235464
														-0.0375252								-0.154315			0.0125891						-0.00890587		0.00641682
														-0.0348443								-0.141103			0.0144297						-0.00294838		0.0121692
														-0.0242835								-0.126705			0.0187494						0.0133105		-0.109263
														-0.017811								-0.125135			0.0187494						-0.114115		-0.104464
														-0.016528								-0.125135			0.0187494						-0.109263		-0.0934686
														-0.00639822								-0.12201			0.0237378						-0.0997175		-0.0857818
														-0.131318								-0.12201			0.0283336						-0.0965818		-0.0857818
														-0.104686								-0.115828			0.0308139						-0.0950224		-0.0857818
														-0.0750461								-0.114296			0.0308139						-0.0857818		-0.0827447
														-0.0720406								-0.111248			0.0311354						-0.0842606		-0.0752438
														-0.0690558								-0.111248			0.0343042						-0.0782286		-0.073759
														-0.067571								-0.103721			0.0343042						-0.0767336		-0.0678702
														-0.0616822								-0.103721			0.0343042						-0.0767336		-0.0664104
														-0.0292886								-0.103721			0.0425524						-0.0767336		-0.0606197
														-0.0225553								-0.0992671			0.0431569						-0.0752438		-0.0549052
																						-0.0977924			0.0524548						-0.073759		-0.0549052
																						-0.0963227									-0.0722793		-0.0478662
																						-0.0963227									-0.0693349		-0.046472
																						-0.0963227									-0.0660462		-0.0327707
																						-0.0933982									-0.0606197		-0.0142873
																						-0.0890479									-0.0606197		0.00344142
																						-0.0890479									-0.057753		0.00960173
																						-0.0861718									-0.0549052		0.0132564
																						-0.0861718									-0.0492649		0.0132564
																						-0.0847409									-0.0492649		0.0180819
																						-0.0833146									-0.0478662		0.0204748
																						-0.0790637									-0.046472		0.0287473
																						-0.0790637									-0.046472
																						-0.077656									-0.0450823
																						-0.0762527									-0.0450823
																						-0.0748541									-0.043697
																						-0.0706848									-0.0423161
																						-0.0706848									-0.0409395
																						-0.0679274									-0.0381995
																						-0.0679274									-0.0381995
																						-0.0679274									-0.0381995
																						-0.0665552									-0.0354766
																						-0.0651873									-0.0300816
																						-0.0638238									-0.0287433
																						-0.0624645									-0.0207986
																						-0.0611094									-0.0194885
																						-0.0597586									-0.0168802
																						-0.0597586									-0.0117099
																						-0.0584119									-0.0117099
																						-0.0584119									-0.0091477
																						-0.0557311									-0.00406818
																						-0.0517406									-0.00155052
																						-0.0517406									-0.000297146
																						-0.0517406									0.0046805
																						-0.0504185
																						-0.0425696
																						-0.0412752
																						-0.0399845
																						-0.0399845
																						-0.0374147
																						-0.0348601
																						-0.0323203
																						-0.0297953
																						-0.0285383
																						-0.027285
																						-0.0210718
																						-0.0210718
																						-0.0198397
																						-0.0186112
																						-0.0186112
																						-0.0137314
																						-0.00413336
																						-0.00176662
																						-0.000588077
																						0.00525716
																						0.0075734
																						0.0121692
																						0.0133105
																						0.0167168
																						0.0178463
																						0.0212173
																						0.0234502
																						-0.114115
																						-0.109263
																						-0.0965818
																						-0.0965818
																						-0.0919203
																						-0.0888402
																						-0.0888402
																						-0.0873083
																						-0.0873083
																						-0.0873083
																						-0.0857818
																						-0.0842606
																						-0.0842606
																						-0.0827447
																						-0.0812341
																						-0.0812341
																						-0.0797288
																						-0.0782286
																						-0.0782286
																						-0.0782286
																						-0.0767336
																						-0.0767336
																						-0.0767336
																						-0.0752438
																						-0.0752438
																						-0.073759
																						-0.0722793
																						-0.0693349
																						-0.0678702
																						-0.0635054
																						-0.0635054
																						-0.0620601
																						-0.0620601
																						-0.0620601
																						-0.0606197
																						-0.059184
																						-0.059184
																						-0.057753
																						-0.0563268
																						-0.0563268
																						-0.0549052
																						-0.0549052
																						-0.0534882
																						-0.0506681
																						-0.043697
																						-0.0409395
																						-0.0409395
																						-0.0409395
																						-0.0395674
																						-0.0395674
																						-0.0381995
																						-0.0381995
																						-0.0327707
																						-0.0314241
																						-0.0287433
																						-0.027409
																						-0.0260789
																						-0.0247528
																						-0.0247528
																						-0.0194885
																						-0.0181824
																						-0.0168802
																						-0.0129967
																						-0.0129967
																						-0.0104269
																						-0.0104269
																						-0.0091477
																						-0.0091477
																						-0.00787224
																						-0.00660051
																						-0.00406818
																						-0.00155052
																						-0.00155052
																						-0.00155052
																						-0.000297146
																						-0.000297146
																						0.000952623
																						0.00219881
																						0.00219881
																						0.00344142
																						0.0108234
																						0.0132564
																						0.0156759
																						0.0180819
																						0.0204748
																						0.0252212
																						0.0287473
																						0.0334046
																						0.0402984
																						0.0537659

## Sheet: Table I. Sus measurements
File S2. Table I. LSI data for Sus scrofa
Author/Reference for pubished data	Redding and Rosenberg 1998	Arbuckle and Özkaya 2006	Gourichon and Helmer 2008	Helmer 2008	Atici	Payne 1985; Buitenhuis and Caneva 1998	Russell et al.	Russell et al.	Russell et al.	Marciniak	Orton and Frame	Arbuckle	Arbuckle	Perkins and Daly 1968	Arbuckle 2012	De Cupere	De Cupere	De Cupere	De Cupere	Çakırkar	Çakırkar	Çakırkar	Galik	Buitenhuis and Caneva 1998	Kansa	Kansa	Kansa	Boessneck and von den Driesch 1979	Galik	Gourichon and Helmer	Gourichon and Helmer	Buitenhuis	Buitenhuis	Buitenhuis	Buitenhuis	Buitenhuis	Buitenhuis	Çakırlar	Çakırlar	Uerpmann 2001
site	Hallan Çemi	Körtik	Mureybet PPNA	Cafer	Öküzini	Aşıklı	Çatalhöyük EARLY	Çatalhöyük MIDDLE	Çatalhöyük LATE	Çatalhöyük TP	Çatalhöyük West	Köşk II-V	Köşk I	Suberde	Erbaba	Bademağacı ENI	Bademağacı ENII	Bademağacı LN/EC	Höyücek	Ulucak VI	Ulucak V	Ulucak IV	Çukurici	Yumuktepe	Domuztepe I	Domuztepe II	Domuztepe III	Fikirtepe	Barcın	Menteşe Early	Menteşe Late	Ilipinar X	Ilipinar IX	Ilipinar VIII	Ilipinar VII	Ilipinar VI	Ilipinar V	Pendik	Yenikapı	Orman Fidanlığı
	-0.00112951	0.0397553	0.00454763	-0.01836	-0.000915268	-0.0160868	0.0681158	0.0152715	0.00779724	0.046797	-0.0619	-0.0166319	0.056165	0.00188824		-0.17482		-0.16871	0.0408796	-0.07731	-0.1173	-0.11529	-0.0891915	-0.0476416	-0.195359	-0.0773631	-0.106973	0.013127	0.045757	0.014633	-0.12204	-0.13628	-0.14581	-0.09546	-0.04648	-0.05089	0.040083	-0.03258	-0.13957	-0.147848
	0.0165993	0.101532	0.0157126	-0.0163025		0.00656377	-0.0391937	0.0367969	0.0300242	0.07265	-0.02851		0.0724479	0.0541907		-0.14305	-0.19042	-0.11739	0.038891	-0.0717	-0.09915	-0.09929	-0.0649957	0.00872983	-0.183564	-0.0683178	-0.114475	0.029422			-0.1031	-0.10895	-0.11417	-0.08959	-0.05892	-0.07938	-0.07553	-0.02228	-0.11793	-0.142668
	0.0262626	0	0.0179116	-0.0139358		0.0276234	0.0892906	-0.0177288	0.0448123			-0.00251766	0.101958	0.109775		-0.11236	-0.18326	-0.10431	0.0319143		-0.08532	-0.09449	-0.0509397	-0.059662	-0.177811	-0.0411909	-0.0755764	0.034176			-0.06555	-0.05065	-0.10213	-0.09236	-0.07133	-0.16854	-0.16522	-0.00341	-0.11711	-0.135949
	0.0304893		0.0244425	-0.00924066		0.0541907	0.0187881	0.0222764	0.0532455			0.0300242	0.147825			-0.09312	-0.18326	-0.08894	-0.0656788		-0.07581	-0.0907	-0.0196946		-0.177209	-0.0813442	-0.0732584	0.046707				-0.04344	-0.09721	-0.07681	-0.06163	-0.19536	-0.09265	0.006531	-0.09194	-0.134699
	0.0367533		0.0308766	-0.00860017		0.0884509	0.0150772	0.0187881	0.0789189			0.0300242				-0.08842	-0.162	-0.08842	-0.119053		-0.07404	-0.07918	-0.0016284		-0.170911	-0.0764201	-0.0131614	0.051435				0.027457	-0.07803	-0.09526	-0.09185	-0.13321	-0.10137		-0.08769	-0.129282
			0.0327925	-0.00860017		0.0321484		0.127844	0.0189886			0.0376362				-0.08662	-0.16058	-0.05975	-0.137827		-0.07365	-0.07787	0.0227621		-0.167236		-0.00917096	0.075691				0.031448	-0.07978	-0.09097	-0.07791	-0.08149	0.022613		-0.08334	-0.126873
			0.0330003	-0.00691199		0.0407968		0.0432491	0.0569417			0.0393234				-0.04028	-0.15459	0.024824	-0.0186822		-0.07096	-0.07604			-0.164098		0.0874578	0.08248				0.039989	-0.07695	-0.08461	-0.06	-0.09629	-0.08133		-0.07342	-0.115725
			0.0393097	-0.0022918				0.0514051	0.0468989							-0.00632	-0.14456	0.035417	-0.0442363		-0.06778	-0.07023			-0.162399		-0.0971561	0.086375				0.040626	-0.07889	-0.05477	-0.04139	-0.02213	-0.08468		-0.0653	-0.0954184
			0.0393097	0				0.0365168	0.0819239			0.0633045				0.02193	-0.12779	0.061643	-0.0849512		-0.06716	-0.06797			-0.158425		-0.0750392	0.090236				0.055977	0.014324	-0.09499	-0.0317	0.037451	-0.09469		-0.06168	-0.0857121
			0.0457575	0.000945146				0.0457575	0.1138			0.0630196				0.03623	-0.10793		-0.119825		-0.06536	-0.06779			-0.157608		-0.0681676	0.090236				0.068523	0.033078	-0.0685	-0.0276		-0.02998		-0.06027	-0.0549841
			0.049626	0.000945146				0.050143	0.0606			0.0248744				0.06147	-0.10075		-0.0913667		-0.05829	-0.06716			-0.154336			0.099442				0.070415	0.034965	-0.08043	-0.1312		-0.09701		-0.05912	-0.0367228
			0.0536849	0.00227977				0.0532455	-0.0421712								-0.09715		0.123219		-0.05685	-0.06531			-0.151523			0.109039				0.092991	-0.05436	-0.07922	-0.08078		-0.08493		-0.0587	0.0115819
			0.0557002	0.00904813				0.0622623	0.00643411								-0.09628		-0.135949		-0.05441	-0.06115			-0.146506			0.123985				0.126888	-0.02415	-0.07757	-0.06108		-0.06868		-0.05402
			0.0577061	0.0102852					0.058154								-0.09361		0.0312577		0.004176	-0.05716			-0.140483			0.127505					-0.01128	-0.02151	-0.10159		-0.06198		-0.05348
			0.0597029	0.0102852					-0.0034468								-0.08998		-0.0308902		0.028422	-0.04954			-0.137473								-0.07412	-0.07693	-0.00249		-0.05195		-0.05033
			0.0608137	0.0135025													-0.08908					-0.04937			-0.136012								-0.06754	-0.07466	0.019413		0.035938		-0.03202
			0.0665411	0.0148809													-0.08842					-0.0389			-0.131788								-0.05543	-0.07476	-0.09709		-0.09233		-0.02354
			0.0665411	0.0148809													-0.08687					-0.01062			-0.124093								-0.05781	-0.05495	-0.08966		0.031039		-0.01571
			0.066566	0.0179116													-0.08432					0.012517			-0.123155								-0.02939	-0.04988	-0.06935		0.059277		-0.00127
			0.066566	0.0200995													-0.07844					0.034278			-0.122461								-0.03264	-0.07892	-0.05355		-0.1134		0.013095
			0.0714944	0.0239291													-0.07766					0.044329			-0.122034								-0.00036	-0.05911	-0.03543		-0.08134
			0.0722431	0.0239291													-0.07467					0.051297			-0.120933								-0.02896	-0.04663	-0.16557		-0.02356
			0.0745838	0.0244425													-0.07426								-0.115725								-0.14045	-0.12385	-0.1306		-0.0179
			0.0756141	0.0283834													-0.0741								-0.112938								-0.11507	-0.12169	-0.0953		0.032474
			0.0757207	0.0351136													-0.07326								-0.11223								-0.0977	-0.11452	-0.0943		-0.12822
			0.077847	0.0370108													-0.07163								-0.109985								-0.09043	-0.11313	-0.05057		0.087407
			0.07855	0.0434657													-0.06938								-0.108654								-0.08258	-0.10474	-0.1603		-0.06016
			0.0811157	0.0541907													-0.06853								-0.107515								-0.06651	-0.10163	-0.08894		-0.17773
			0.0824803	0.0573253													-0.06579								-0.107419								-0.07679	-0.09848	-0.07384		-0.08249
			0.0888424	0.0573253													-0.06565								-0.10686								0.00809	-0.08411	-0.0954		0.011923
			0.0888424	0.0583466													-0.06458								-0.105183								-0.15234	-0.07918	-0.05756
			0.0917088	0.0591215													-0.06383								-0.104542								-0.1481	-0.12229	-0.02641
			0.0931638	0.059654													-0.05928								-0.102662								-0.06681	-0.14092	0.011972
			0.09691	0.0597029													-0.05818								-0.0977692								-0.14597	-0.12455
			0.107129	0.0608137													-0.05747								-0.0947115								-0.13221	-0.13222
			0.110032	0.0757207													-0.05591								-0.0946934								-0.1351	-0.12349
			0.126873	0.077847													-0.05474								-0.093117								-0.11281	-0.12071
				0.0800685													-0.05015								-0.0902328								-0.41783	-0.08776
				0.0811157													-0.04887								-0.0887921								-0.1168	-0.008
				0.0811157													-0.04792								-0.0861193								-0.10191	-0.16697
				0.0811157													-0.03958								-0.083777								-0.11975	-0.161
				0.0811157													-0.03791								-0.0837425								-0.11121	-0.13937
				0.0863753													-0.03165								-0.082565								-0.0901	-0.13418
				0.0888424													-0.02262								-0.0815023								-0.08432	-0.14285
				0.0917088													-0.01773								-0.0808232								-0.08248	-0.12632
				0.10205													-0.01719								-0.0769031								-0.06535	-0.12571
				0.10483													-0.01039								-0.076863								0.014496	-0.11235
				0.118226													-0.00909								-0.0757332								-0.10568	-0.11871
				0.120251													0.010859								-0.0748604								-0.03496	-0.10186
																	0.013888								-0.0746336								0.026131	-0.11338
																	0.019429								-0.0746336								-0.08665	-0.09361
																	0.01964								-0.0738671								-0.14278	-0.09731
																	0.029455								-0.072548								-0.13413	-0.09731
																	0.031006								-0.0721798								-0.11731	-0.11674
																	0.031961								-0.0711331								-0.11419	-0.09891
																	0.032445								-0.0710957								-0.10012	-0.11075
																	0.035452								-0.0695779								-0.06023	-0.09124
																	0.036517								-0.0691374								-0.06302	-0.0808
																	0.036704								-0.0691364								-0.06619	-0.07615
																	0.043157								-0.0666608								-0.05058	-0.0763
																	0.057019								-0.0666035								-0.04804	-0.08435
																	0.057401								-0.0656523								-0.00688	-0.08823
																	0.063787								-0.0647735								0.047346	-0.09046
																	0.067132								-0.0645221								0.023282	0.005752
																	0.070581								-0.0639414								-0.05165	0.034917
																	0.083112								-0.061518								-0.04206	0.038013
																	0.090236								-0.0597527								-0.04006	-0.07401
																									-0.0588028								-0.03576	-0.05486
																									-0.0579132								-0.06533	-0.17925
																									-0.0569049								-0.03801	0
																									-0.0569049								-0.01481	0.045757
																									-0.0554596								-0.17036	-0.09048
																									-0.0552228								-0.13117	-0.10654
																									-0.0552228								-0.08944	-0.08376
																									-0.0537531								-0.09691	-0.01152
																									-0.0529875								-0.08167	-0.09948
																									-0.0525835								-0.06985	0.057564
																									-0.0497263								-0.06695	-0.08911
																									-0.0489526								-0.14842	-0.06039
																									-0.0487548								-0.10395	-0.00488
																									-0.0483047								-0.09307	0.141599
																									-0.0479236								-0.07533	-0.11627
																									-0.0469959								-0.13435	-0.09022
																									-0.0460815								-0.10589	-0.09952
																									-0.0424857								-0.09946	-0.0877
																									-0.0423061								-0.05355	-0.07572
																									-0.0419565								-0.04767	-0.05552
																									-0.0408488								-0.03746	-0.01515
																									-0.0403121								-0.08842	0.002475
																									-0.0401123								-0.07766	0.012234
																									-0.0394305								-0.03467	0.028804
																									-0.0380263								-0.0321	0.008183
																									-0.0308902								0.103168	-0.14309
																									-0.0248236								-0.10041	-0.14133
																									-0.0226788								-0.09002	-0.14133
																									-0.0210165								-0.09466	-0.12241
																									-0.0131614								-0.20658	-0.06498
																									-0.00254719								-0.13301	-0.07448
																									0.00660562								-0.11636	-0.11407
																									0.0151674								-0.09199	-0.06672
																									0.0222764								-0.10263	-0.10106
																									0.0288382								-0.10458	-0.10106
																									0.0365168								-0.0805	-0.09786
																									0.064409								-0.09474	-0.09786
																									0.0914988								-0.06873	-0.09628
																									0.112195								-0.08151	-0.04805
																																	-0.09035	-0.04845
																																	-0.06282	-0.08532
																																	-0.05045	-0.03284
																																	-0.04633	-0.02832
																																	0.046296	0.058151
																																	0.088121	-0.10851
																																	-0.13899	-0.13582
																																	-0.13689	-0.15373
																																	-0.09204	-0.13226
																																	-0.07481	-0.11591
																																	-0.08988	-0.11168
																																	-0.13033	-0.10441
																																	-0.12113	-0.07416
																																	-0.10134	-0.10836
																																	-0.09087	-0.09149
																																	0.029044	-0.09327
																																	-0.00258	-0.04908
																																	-0.08588	-0.06903
																																	-0.00268	-0.07263
																																	-0.07084	-0.05137
																																	-0.04193	-0.06765
																																	-0.05387	0.002098
																																	-0.03377	0.101691
																																	-0.03993	-0.09656
																																	-0.02012	-0.06676
																																	0.016585	0.075689
																																	0.005926	-0.12622
																																	0.025673	-0.12214
																																	0.104735	-0.10134
																																	-0.12047	-0.09095
																																	-0.11516	-0.08754
																																	-0.04247	-0.07789
																																	-0.03951	-0.08129
																																	-0.02785	-0.07965
																																	-0.0137	-0.07157
																																	-0.01093	-0.0682
																																	0.002689	-0.06437
																																		0.03515
																																		-0.05363
																																		-0.01414
																																		-0.06772
																																		-0.07187
																																		-0.04473
																																		-0.00873
																																		-0.02955
																																		-0.01419
																																		-0.00563
																																		0.005319
																																		0.004704
																																		0.005355
																																		0.006004
																																		0.009451
																																		0.027932
																																		-0.10474
																																		-0.06852
																																		-0.02929
																																		-0.01931
																																		0.018483
