# Supplementary material for: Data Sharing Reveals Complexity in the Westward Spread of Domestic Animals across Neolithic Turkey
Source: PLoS One. 2014 Jun 13;9(6):e99845. doi: 10.1371/journal.pone.0099845 (PMC4057358; doi:10.1371/journal.pone.0099845)
Supplement: Table S10 — Results of ANOVA for LSI values for Sus . (XLSX) [file pone.0099845.s011.xlsx]

## Sheet: Dataset S4
One-way ANOVA
	Sum of sqrs	df	Mean square	F	p(same)
Between groups:	1.90235	33	0.0576471	18.62	1.188e-77
Within groups:	2.48967	804	0.00309661
Total:	4.39203	837
omega^2:	0.4096
Levene's test for homogeneity of variance, based on means: p(same) =	5.752e-07
Based on medians: p(same) =	0.0001489
Welch F test in the case of unequal variances:	F=35.18, df=56.75, p=2.405E-27
	Hallan Çemi	Körtik	Mureybet	Cafer	Aşıklı	Çatalhöyük EARLY	Çatalhöyük MIDDLE	Çatalhöyük LATE	Çatalhöyük TP	Çatalhöyük West	Köşk EC	Köşk MC	Suberde	Bademağacı ENI	Bademağacı ENII	Bademağacı LN/EC	Höyücek	Ulucak VI	Ulucak V	Ulucak IV	Çukuriçi	Yumuktepe	Domuztepe I	Domuztepe II	Domuztepe III	Fikirtepe	Menteşe Late	Ilipinar X	Ilipinar IX	Ilipinar VIII	Ilipinar VI-IV	Yenikapı	Pendik	Orman Fidanlığı
Hallan Çemi		1	1	1	1	1	1	1	1	0.9595	1	0.8946	1	0.7848	0.9628	0.8005	0.99	0.3238	0.6492	0.9121	0.9974	0.9982	0.2876	0.465	0.8329	0.9987	0.03776	1	0.4553	0.4259	0.7104	0.6648	1	0.02795
Körtk	1.172		1	1	1	1	1	1	1	0.4229	1	0.9999	1	0.1758	0.4347	0.187	0.5975	0.02701	0.1055	0.3107	0.7257	0.7536	0.02215	0.05189	0.2137	1	0.001194	1	0.04983	0.04394	0.1324	0.1118	0.9918	0.0008096
Mureybet	1.97	0.7981		1	1	1	1	1	1	0.1034	1	1	1	0.02853	0.1081	0.03107	0.1879	0.002649	0.01448	0.06414	0.2786	0.3035	0.002094	0.005871	0.03737	1	9.291e-05	0.9999	0.005583	0.00478	0.01949	0.01561	0.818	6.975e-05
Cafer	0.8656	0.3059	1.104		1	1	1	1	1	0.6036	1	0.9985	1	0.3009	0.616	0.3169	0.7689	0.05819	0.1951	0.4775	0.8673	0.8862	0.0486	0.1046	0.3536	1	0.003221	1	0.1009	0.09018	0.237	0.205	0.9989	0.002231
Aşıklı	0.5366	0.6349	1.433	0.329		1	1	1	1	0.7854	1	0.9884	1	0.4791	0.7953	0.4984	0.9033	0.1216	0.3398	0.6725	0.9564	0.965	0.1038	0.202	0.5415	1	0.008715	1	0.1959	0.1779	0.3974	0.3538	0.9999	0.006164
Çatalhöyük EARLY	0.3992	0.7724	1.57	0.4664	0.1374		1	1	1	0.8469	1	0.977	1	0.561	0.8552	0.5806	0.9395	0.1606	0.4139	0.748	0.9759	0.9812	0.1384	0.2576	0.6236	1	0.01296	1	0.2504	0.2291	0.4759	0.4291	1	0.009253
Çatalhöyük MIDDLE	0.935	0.2366	1.035	0.06935	0.3984	0.5358		1	1	0.5622	1	0.9991	1	0.2687	0.5746	0.2836	0.7329	0.04923	0.1711	0.4372	0.8399	0.8611	0.04093	0.08989	0.3183	1	0.002592	1	0.08661	0.07716	0.2094	0.1801	0.9982	0.001791
Çatalhöyük LATE	0.8829	0.2887	1.087	0.01725	0.3462	0.4837	0.05211		1	0.5934	1	0.9987	1	0.2927	0.6057	0.3084	0.7601	0.05584	0.1889	0.4674	0.8608	0.8803	0.04659	0.1008	0.3447	1	0.003052	1	0.09718	0.08678	0.2299	0.1986	0.9987	0.002112
Çatalhöyük TP	1.755	0.5844	0.2132	0.8902	1.219	1.356	0.8208	0.8729		1	1	0.1486	0.9632	1	1	1	1	0.9809	0.9995	1	1	1	0.973	0.9954	1	0.5748	0.5998	1	0.9949	0.9931	0.9998	0.9996	1	0.5298
Çatalhöyük West	3.102	4.274	5.072	3.968	3.639	3.502	4.037	3.985	1.576		0.8565	0.0023	0.2342	1	1	1	1	1	1	1	1	1	1	1	1	0.02984	0.9993	0.9868	1	1	1	1	1	0.9984
Köşk EC	0.3751	0.7965	1.595	0.4905	0.1615	0.0241	0.5599	0.5078	1.901	3.478		0.9744	1	0.5754	0.8645	0.595	0.9447	0.1683	0.4275	0.7604	0.9784	0.9833	0.1453	0.2683	0.6378	0.9999	0.01387	1	0.2609	0.2389	0.4901	0.4429	1	0.009924
Köşk MC	3.371	2.2	1.402	2.506	2.835	2.972	2.436	2.488	4.897	6.474	2.996		1	0.0003847	0.002456	0.0004292	0.005741	4.512e-05	0.0001701	0.001145	0.01107	0.01289	4.125e-05	7.222e-05	0.0005467	1	3.091e-05	0.7971	6.953e-05	6.228e-05	0.00024	0.0001852	0.1281	3.085e-05
Suberde	1.553	0.3814	0.4167	0.6874	1.016	1.154	0.618	0.6701	3.079	4.655	1.178	1.818		0.07904	0.2428	0.08509	0.3755	0.009382	0.04356	0.1579	0.5029	0.5344	0.007538	0.01943	0.0998	1	0.000334	1	0.01856	0.01612	0.05665	0.04656	0.9505	0.0002275
Bademağacı ENI	3.64	4.812	5.61	4.506	4.177	4.039	4.575	4.523	2.114	0.5377	4.015	7.011	5.193		1	1	1	1	1	1	1	1	1	1	1	0.006624	1	0.8861	1	1	1	1	1	1
Bademağacı ENII	3.082	4.253	5.051	3.947	3.618	3.481	4.017	3.965	1.555	0.02072	3.457	6.453	4.635	0.5585		1	1	1	1	1	1	1	1	1	1	0.03149	0.9992	0.9882	1	1	1	1	1	0.9982
Bademağacı LN/EC	3.607	4.779	5.577	4.473	4.144	4.007	4.542	4.49	2.081	0.505	3.983	6.979	5.16	0.03274	0.5257		1	1	1	1	1	1	1	1	1	0.007301	1	0.8969	1	1	1	1	1	1
Höyücek	2.807	3.978	4.776	3.672	3.343	3.206	3.742	3.69	1.281	0.2957	3.182	6.178	4.36	0.8334	0.2749	0.8007		1	1	1	1	1	1	1	1	0.06217	0.9948	0.9978	1	1	1	1	1	0.9898
Ulucak VI	4.459	5.631	6.429	5.325	4.996	4.858	5.394	5.342	2.933	1.357	4.834	7.83	6.012	0.819	1.377	0.8517	1.652		1	1	1	1	1	1	1	0.0004735	1	0.4563	1	1	1	1	0.9868	1
Ulucak V	3.891	5.062	5.861	4.756	4.427	4.29	4.826	4.774	2.365	0.7884	4.266	7.262	5.444	0.2507	0.8092	0.2834	1.084	0.5683		1	1	1	1	1	1	0.003077	1	0.7813	1	1	1	1	0.9997	1
Ulucak IV	3.314	4.485	5.284	4.18	3.851	3.713	4.249	4.197	1.788	0.2115	3.689	6.685	4.867	0.3262	0.2322	0.2935	0.5072	1.145	0.5769		1	1	1	1	1	0.01693	0.9999	0.9645	1	1	1	1	1	0.9997
Çukuriçi	2.584	3.755	4.553	3.449	3.12	2.983	3.519	3.466	1.057	0.5188	2.959	5.955	4.137	1.057	0.4981	1.024	0.2232	1.876	1.307	0.7304		1	1	1	1	0.103	0.9823	0.9996	1	1	1	1	1	0.9696
Yumuktepe	2.531	3.702	4.5	3.396	3.067	2.93	3.466	3.414	1.004	0.5717	2.906	5.902	4.084	1.109	0.551	1.077	0.2761	1.928	1.36	0.7832	0.05288		1	1	1	0.1153	0.9772	0.9997	1	1	1	1	1	0.962
Domuztepe I	4.534	5.705	6.503	5.399	5.07	4.933	5.469	5.417	3.008	1.431	4.909	7.905	6.087	0.8936	1.452	0.9263	1.727	0.07459	0.6429	1.22	1.95	2.003		1	1	0.0003689	1	0.4137	1	1	1	1	0.9808	1
Domuztepe II	4.201	5.372	6.171	5.067	4.738	4.6	5.136	5.084	2.675	1.098	4.576	7.572	5.754	0.5607	1.119	0.5934	1.394	0.2583	0.31	0.8869	1.617	1.67	0.3329		1	0.001123	1	0.6099	1	1	1	1	0.9971	1
Domuztepe III	3.535	4.707	5.505	4.401	4.072	3.934	4.47	4.418	2.009	0.4328	3.91	6.906	5.088	0.1049	0.4535	0.07219	0.7285	0.9239	0.3556	0.2213	0.9517	1.005	0.9985	0.6656		0.009028	1	0.9182	1	1	1	1	1	1
Fikirtepe	2.49	1.319	0.5205	1.624	1.953	2.091	1.555	1.607	4.016	5.593	2.115	0.8811	0.9371	6.13	5.572	6.098	5.297	6.949	6.381	5.804	5.074	5.021	7.024	6.691	6.025		3.803e-05	0.9934	0.001062	0.0008961	0.004298	0.003347	0.5308	3.514e-05
Menteşe Late	5.501	6.672	7.47	6.366	6.037	5.9	6.436	6.384	3.975	2.398	5.876	8.872	7.054	1.861	2.419	1.893	2.694	1.042	1.61	2.187	2.917	2.97	0.967	1.3	1.966	7.991		0.06819	1	1	1	1	0.6431	1
Ilipinar X	0.2434	1.415	2.213	1.109	0.78	0.6426	1.178	1.126	1.283	2.859	0.6185	3.615	1.796	3.397	2.838	3.364	2.563	4.216	3.647	3.071	2.34	2.287	4.29	3.957	3.292	2.734	5.257		0.6	0.5694	0.831	0.7943	1	0.05166
Ilipinar IX	4.218	5.389	6.187	5.083	4.754	4.617	5.153	5.1	2.691	1.115	4.593	7.589	5.771	0.5774	1.136	0.6101	1.411	0.2416	0.3267	0.9036	1.634	1.687	0.3162	0.01668	0.6823	6.708	1.283	3.974		1	1	1	0.9968	1
Ilipinar VIII	4.269	5.44	6.238	5.134	4.805	4.668	5.204	5.152	2.743	1.166	4.644	7.64	5.822	0.6286	1.187	0.6613	1.462	0.1904	0.3779	0.9548	1.685	1.738	0.265	0.06788	0.7335	6.759	1.232	4.025	0.0512		1	1	0.9955	1
Ilipinar VI-IV	3.783	4.955	5.753	4.649	4.32	4.182	4.718	4.666	2.257	0.6806	4.158	7.154	5.336	0.1428	0.7013	0.1756	0.9763	0.6761	0.1079	0.4691	1.199	1.252	0.7507	0.4179	0.2478	6.273	1.718	3.54	0.4346	0.4857		1	0.9999	1
Yenikapı	3.864	5.035	5.834	4.73	4.401	4.263	4.799	4.747	2.338	0.7615	4.239	7.235	5.417	0.2237	0.7822	0.2565	1.057	0.5952	0.02696	0.55	1.28	1.333	0.6698	0.337	0.3287	6.354	1.637	3.621	0.3537	0.4049	0.0809		0.9998	1
Pendik	1.6	2.771	3.569	2.465	2.136	1.999	2.535	2.482	0.07336	1.503	1.975	4.971	3.153	2.041	1.482	2.008	1.207	2.86	2.291	1.714	0.984	0.9311	2.934	2.601	1.936	4.09	3.901	1.356	2.618	2.669	2.183	2.264		0.5737
Orman Fidanlığı	5.618	6.789	7.587	6.483	6.154	6.017	6.553	6.501	4.091	2.515	5.993	8.989	7.171	1.978	2.536	2.01	2.811	1.159	1.727	2.304	3.034	3.087	1.084	1.417	2.082	8.108	0.1169	5.374	1.4	1.349	1.835	1.754	4.018
Dataset S4. Results of ANOVA for LSI values for Sus. Tukey's pairwise comparisons: Q below diagonal, p(same) above diagonal. Bold indicates p value <0.05.
